# Supplementary material for: Reflections on communication of disease prognosis and life expectancy by patients with colorectal cancer undergoing palliative care: a qualitative study
Source: PubMed Central journal article supplement — BMJ Open. 2019 Mar 7;9(3):e023463. doi: 10.1136/bmjopen-2018-023463 (PMC6429716; doi:10.1136/bmjopen-2018-023463), 2019-03-07
Supplement: bmjopen-2018-023463.draft_revisions.pdf [file bmjopen-2018-023463.draft_revisions.pdf]

# BMJ Open

BMJ Open is committed to open peer review. As part of this commitment we make the peer review history of every article we publish publicly available.

When an article is published we post the peer reviewers' comments and the authors' responses online. We also post the versions of the paper that were used during peer review. These are the versions that the peer review comments apply to.

The versions of the paper that follow are the versions that were submitted during the peer review process. They are not the versions of record or the final published versions. They should not be cited or distributed as the published version of this manuscript.

BMJ Open is an open access journal and the full, final, typeset and author-corrected version of record of the manuscript is available on our site with no access controls, subscription charges or pay-per-view fees (<http://bmjopen.bmj.com>).

If you have any questions on BMJ Open's open peer review process please email [editorial.bmjopen@bmj.com](mailto:editorial.bmjopen@bmj.com)

# BMJ Open

## Communication of disease prognosis and life expectancy in patients with colorectal cancer undergoing palliative care: a qualitative study

|                               |                                                                                                                                                                                                                                                                                                                                                                                         |
|-------------------------------|-----------------------------------------------------------------------------------------------------------------------------------------------------------------------------------------------------------------------------------------------------------------------------------------------------------------------------------------------------------------------------------------|
| Journal:                      | <i>BMJ Open</i>                                                                                                                                                                                                                                                                                                                                                                         |
| Manuscript ID                 | bmjopen-2018-023463                                                                                                                                                                                                                                                                                                                                                                     |
| Article Type:                 | Research                                                                                                                                                                                                                                                                                                                                                                                |
| Date Submitted by the Author: | 10-Apr-2018                                                                                                                                                                                                                                                                                                                                                                             |
| Complete List of Authors:     | Rohde, Gudrun; University of Agder, Faculty of Health and Sport Sciences; Sorlandet Hospital , Department of Clinical Research<br>Söderhamn, Ulrika; University of Agder, Centre for Caring Research – Southern Norway, Department of Health and nursing Sciences, Faculty of Health and Sport Sciences<br>Vistad, Ingvild ; Sorlandet Hospital Kristiansand , Obstetric and gynegology |
| Keywords:                     | palliative care information, vulnerability, death sentence, life-world, compassion                                                                                                                                                                                                                                                                                                      |
|                               |                                                                                                                                                                                                                                                                                                                                                                                         |

SCHOLARONE™  
Manuscripts

Peer Review Only

1  
2  
3  
4 **Communication of disease prognosis and life expectancy in patients with**  
5  
6 **colorectal cancer undergoing palliative care: a qualitative study**  
7  
8  
9

10  
11  
12 **Authors:**

13  
14 Gudrun Rohde, PhD (Corresponding author)

15  
16 Professor, University of Agder, Faculty of Health and Sport Sciences and Department of  
17  
18 Clinical Research, Sorlandet Hospital Kristiansand

19  
20 Postbox 422, 4604 Kristiansand, Norway

21  
22 Phone: +47 99164094

23  
24 Email: ([gudrun.e.rohde@uia.no](mailto:gudrun.e.rohde@uia.no))  
25  
26  
27  
28

29  
30 Ulrika Söderhamn, PhD

31  
32 Professor

33  
34 University of Agder, Faculty of Health and Sport Sciences

35  
36 Postbox 509

37  
38 4898 Grimstad, Norway

39  
40 Phone: +47 416 98 753

41  
42 Email: [Ulrika.soderhamn@uia.no](mailto:Ulrika.soderhamn@uia.no)  
43  
44  
45  
46

47  
48 Ingvild Vistad, PhD

49  
50 Department of Obstetrics and Gynecology, Sorlandet Hospital HF, Kristiansand

51  
52 Gynaecologist and Professor

53  
54 Postbox 416, 4604 Kristiansand, Norway  
55

1  
2  
3 Phone: +47 97532316  
4

5 Email: [Ingvild.vistad@sshf.no](mailto:Ingvild.vistad@sshf.no)  
6  
7  
8  
9  
10  
11  
12  
13  
14  
15  
16  
17  
18  
19  
20  
21

22 **Abstract:**  
23

24 **Objectives** Patients with colorectal cancer receiving non-curative treatment receive extensive  
25 amounts of treatment-related information throughout their disease trajectory. We aimed to  
26 explore the experiences of patients with incurable colorectal cancer and their reflections upon  
27 information given by physicians and nurses while in palliative care. Our main focus was the  
28 patients' thoughts about how disease and life expectancy were communicated, from the first  
29 time that they were informed about the incurable nature of their disease through to post-  
30 surgery palliative treatment.  
31  
32  
33  
34  
35  
36  
37  
38

39 **Settings** Patients with colorectal cancer receiving non-curative chemotherapy  
40

41 **Research design** We used a qualitative approach, and the data were analysed according to  
42 qualitative content analysis.  
43  
44  
45

46 **Participants** Twenty patients (34–75 years of age) were included in the study: 12 received  
47 first-line chemotherapy, and eight received second-line chemotherapy. Eleven patients were  
48 treated by oncologists, and nine were treated by junior physicians.  
49  
50

51 **Results** Through data-driven empirical analysis, we identified four themes: (1) initial  
52 information was perceived as a death sentence, (2) palliative chemotherapy and  
53  
54  
55  
56

1  
2  
3 compassionate physicians and nurses offered hope, (3) the information given should be  
4 truthful and (4) professional, personal and organizational factors influenced information and  
5 communication.  
6  
7

8  
9 **Conclusion** Receiving the first information of having an incurable disease was experienced as  
10 a death sentence, while post-surgery palliative chemotherapy offered hope. The patients  
11 preferred customized information about treatment and likely future perspectives, and doctors  
12 and nurses with a holistic approach focusing on their life-world with compassion.  
13  
14  
15

16  
17 **Implication for Practice** To be a sensitive, holistic, and compassionate physician or nurse  
18 requires knowledge and confidence. To achieve this, training and guidance at universities and  
19 in hospital wards are needed.  
20  
21  
22  
23

#### 24 25 26 **Strengths and limitations of the study**

- 27  
28 • Knowledge of how colorectal cancer in palliative care look upon information and  
29 communication of disease and life expectancy throughout the disease trajectory  
30  
31
- 32  
33 • Patients preferences for professional, personal, and especially organizational factors  
34 facilitating or inhibiting communication.  
35  
36
- 37  
38 • On group of patients in palliative care  
39  
40  
41  
42

43 **Key words:** palliative care information; vulnerability; death sentence; life-world, compassion  
44  
45

46 **Words: 4401**  
47  
48  
49  
50  
51  
52  
53  
54  
55

## Background

Patients with cancer treated with non-curative intent receive extensive amounts of disease-related information from the first time that they are informed about the incurable nature of their disease, through the following months or even years with treatment and care<sup>1-4</sup>

Guidelines encourage health care professionals (HCPs) such as physicians and nurses to inform and discuss prognoses and likely future perspectives with the patients. However, many HCPs and patients struggle with the right approach for these discussions.<sup>5-7</sup> In a systematic review in 2007, Hancock et al.<sup>5</sup> showed that although most HCPs believed that patients should be told the truth about their prognosis, in practice, many either avoid discussing the topic or withhold information. Other studies have emphasized that primarily focusing on open communication regarding the bleak prospects of life expectancy entails a risk of overrunning the individual's information needs and hopes.<sup>8</sup>

Most studies focusing on patient–HCP communication of disease and prognosis in patients with incurable cancer are quantitative involving patients in an early stage of the disease.<sup>6</sup> Qualitative studies show that most patients acknowledge the chronic and incurable nature of their disease<sup>9 10</sup> and they are aware that that palliative chemotherapy aims to relieve symptoms and, potentially, to postpone death.<sup>9</sup> Some studies show that many patients prefer a straightforward presentation of their prognosis,<sup>11 12</sup> while others underline individual differences in the preference for honesty in communication.<sup>10</sup> Some patients even prefer HCPs to avoid being too exact.<sup>13 14</sup> Patients prefer communication with caring and trusting HCPs.<sup>11 12 15</sup> Furthermore, patients emphasize personal and professional knowledge of the nurses as being important in palliative care,<sup>16</sup> and their information needs are both disease and illness oriented.<sup>17</sup> Hope is important for patients with incurable cancer, and they appreciate HCPs giving this.<sup>11 12</sup> There is a fine balance between telling the truth and

1  
2  
3 nurturing hope,<sup>13 14</sup> and there is a spectrum of hope, from hope for a cure to hope for living as  
4 normally as possible.<sup>13 14</sup>  
5  
6

7 Patients with cancer in a palliative phase of treatment are vulnerable, and good  
8 patient–HCP relationships are important.<sup>18</sup> The philosopher Løgstrup<sup>19</sup> emphasized the  
9 importance of trust in such relationships. Trust is something fundamental in our lives and  
10 implies that you expose yourself to others and become vulnerable. Vulnerability implies that  
11 others are in control and hold some of their fellow humans' life in their hands.<sup>19</sup> Furthermore,  
12 Mishler<sup>20</sup> distinguished between the voice of medicine (the technical–scientific assumptions  
13 of medicine) and the voice of the life-world (the natural attitudes of everyday life), which  
14 represent different ways of conceptualizing and understanding patients' problems in patient–  
15 physician communication. He suggested an increased attentiveness to the voice of the patients  
16 in terms of their life-world.  
17  
18  
19  
20  
21  
22  
23  
24  
25  
26  
27

28 Patients with incurable cancer might experience a life crisis when they are informed  
29 about the incurable nature of their cancer.<sup>21</sup> Over time, most of them adjust to their new life  
30 situation, and during this time, preferences and experiences regarding information and  
31 communication might change.<sup>18</sup> There is limited knowledge of how patients with colorectal  
32 cancer in palliative care look upon information and communication of disease and life  
33 expectancy throughout the disease trajectory, as there have been few studies with  
34 heterogeneous groups of patients. There is also scarce knowledge of professional, personal,  
35 and especially organizational factors facilitating or inhibiting communication. Therefore, we  
36 aimed to explore the experiences of patients with incurable colorectal cancer and their  
37 reflections upon information given by physicians and nurses while in palliative care. Our  
38 main focus was the patients' thoughts about how disease prognoses and life expectancy were  
39 communicated, from the first time that they were informed about the incurable nature of the  
40 disease through to post-surgery treatment.  
41  
42  
43  
44  
45  
46  
47  
48  
49  
50  
51  
52  
53  
54  
55

## Methods

We chose a qualitative approach using in-depth interviews<sup>22 23</sup> and invited patients with metastatic colorectal cancer who were referred for non-curative chemotherapy at three regional hospitals in Southern Norway. Oncologists informed patients at the outpatient clinics about the study when they attended for the second or third cycle of chemotherapy. Surgery is performed at the surgery department, with surgeons being responsible for the patients in this phase. Chemotherapy is provided at an oncological outpatient clinic with oncologists being responsible for the treatment.

The patients were eligible for inclusion if they were aged 18 years or older, had metastatic colorectal cancer, were undergoing surgery for their cancer, had been referred for first- or second-line non-curative chemotherapy, had a life expectancy of >6 months and were able to give written informed consent. We included patients of different ages, marital statuses and other demographic and clinical characteristics.<sup>24</sup> We excluded patients with any significant comorbidity that could compromise life expectancy, or inability to understand or read Norwegian. Patients with conditions that the physician believed could affect the patient's ability to understand or cope with the questions were not considered to be eligible, including patients who were considered to be too emotionally vulnerable ( $n = 4$ ). The patients were included consecutively.

Twenty patients with colorectal cancer (34–75 years of age) were invited to participate in the study over a period of 1 year, and all of them accepted the invitation. All patients received combination chemotherapy (see Table 1) and had few physical symptoms related to their disease. The sample comprised 12 patients receiving first-line chemotherapy (five women and seven men) and eight receiving second-line chemotherapy (three women and five men). Eleven patients were treated by oncologists, and nine were treated by junior physicians.



<Table 1 about here>

## Data collection

The same researcher (GR) conducted all the interviews. At 2–4 days after the interview, GR contacted the patient and asked whether the interview had influenced him or her negatively. No patients experienced a negative influence or reaction. We performed in-depth interviews lasting 50–100 minutes using a semi-structured interview guide to ensure that we included the issues in focus<sup>22</sup> and asked questions such as the following. “What do you think about the first information that you received about your disease?” “How was the information provided about the follow-up chemotherapy and likely future perspectives?” “Have you received the information as you expected or is there anything missing?” After the 11<sup>th</sup> interview, we did some preliminary analyses and made minor changes to the interview guide to obtain more data on issues that needed to be expanded to answer the research aim; for example, “What characterized the good information that you received versus other information that you were not happy with?” Patients were included until data saturation was achieved.<sup>22</sup> One interview took place at the patient’s home. The other interviews took place at the cancer centre or outpatient clinics, at a time when the patients had an appointment. The researchers did not know the patients before the interviews and did not treat the patients.

## Analysis

We audiotaped and transcribed the interviews verbatim and made logs after each interview. The data were analysed according to qualitative content analysis to identify the themes in the data. In the discussion, our findings were interpreted in light of the researchers’ previous understanding and theory.<sup>22</sup> GR and US are both nurses and professors in health sciences with clinical experience in palliative care. IV is a gynaecologist and professor, also with extensive experience in treating patients with cancer undergoing palliative care.

1  
2  
3 In the analyses, we (i) read all the interviews to understand the meaning of the whole  
4 text, (ii) investigated sentences or sections to expose their meaning and to facilitate the  
5 identification of themes, (iii) related sentences or sections to the meaning of the whole text  
6 and (iv) identified passages representative of shared understandings between the researchers  
7 and participants.<sup>22</sup> To support the analysis, we created mind maps and discussed the analysis  
8 among the authors. Quotations have been used to illustrate and support the findings. To  
9 validate the findings, all authors participated in discussions of the empirical analysis and in  
10 writing up the findings.  
11  
12  
13  
14  
15  
16  
17  
18  
19  
20

### 21 **Ethics**

22  
23 Voluntariness and confidentiality were assured during the collection, handling and reporting  
24 of data.<sup>25 26</sup> The study was approved by the Regional Committee for Medical Research Ethics  
25 (REK South-East 2011/2464).  
26  
27  
28  
29  
30

### 31 **Patient involvement**

32 Before we started the study, we performed three pilot-interviews with cancer patients to test  
33 the study design and interview-guide, and we made minor changes to the guide. These  
34 interviews are not included in the study. No further patients' involvement was undertaken  
35 when it comes to the specific aims or interpretation of the findings. The dissemination of the  
36 findings will be this publication.  
37  
38  
39  
40  
41  
42  
43  
44

### 45 **Findings**

46 Through data-driven empirical analysis, we identified four themes: (1) initial information was  
47 perceived as a death sentence, (2) palliative chemotherapy and compassionate physicians and  
48 nurses offered hope, (3) the information given should be truthful and (4) professional,  
49 personal and organizational factors influenced information and communication.  
50  
51  
52  
53  
54  
55

1  
2  
3 We did not identify any differences between participants receiving first- or second-line  
4  
5 chemotherapy.  
6  
7

### 9 **Initial information was perceived as a death sentence**

10  
11 The participants experienced receiving information about the incurable nature of their cancer  
12  
13 differently, and the information was given in different settings. Some had to wait a long time  
14  
15 (weeks or months) from their first worries about the disease until they could be examined or  
16  
17 have an appointment at the hospital. When the cancer was finally diagnosed, they received  
18  
19 limited apologies from the physicians because of the delay and emphasized that an excuse  
20  
21 would have made the situation easier to handle. Other participants had to wait for weeks  
22  
23 before they received test results because the results from computer tomography scans had not  
24  
25 been forwarded quickly enough to the referring doctor. Some had not even felt particularly ill,  
26  
27 and it was hard for them to understand the message about having an incurable disease when  
28  
29 the doctor informed them. Most participants were informed about their diagnosis by surgeons,  
30  
31 except for two who were informed by their general practitioners (GPs). Several participants  
32  
33 experienced the first information about the incurable nature of their disease as a shock.  
34  
35  
36

37  
38 Some participants reported that surgeons or GPs had given the message in an  
39  
40 inappropriate way, at an inappropriate place (e.g., in a small examination room). Further  
41  
42 questions from the participants were answered only to a limited extent, if at all.  
43  
44

45 *“When the surgeon gave me the message that my disease was incurable, I was shocked, I*  
46  
47 *didn’t feel that anything was wrong. I asked him how long I had left to live. He just shrugged*  
48  
49 *and didn’t have any answer. The conversation took 8 minutes.” (patient 4, woman aged 54*  
50  
51 *years).*  
52  
53  
54  
55

1  
2  
3 The message was experienced as a death sentence, and several participants felt left behind  
4 with unanswered questions. The message was brutal to hear; however, some participants  
5 admitted that a straightforward message was probably the best way.  
6  
7

8  
9 Some participants experienced that the information before and after the operation was  
10 insufficient. A couple of participants received a message that complete tumour resection was  
11 impossible or that nearly nothing could be done, and they experienced this as a message of  
12  
13  
14  
15  
16 “go home and wait for death”.

17  
18  
19 *“She (the surgeon) should not talk with people. Or learn a phrase telling the patients that*  
20 *other HCPs will talk with you about this.” (patient 4, woman aged 54 years).*  
21  
22

23  
24 On the other hand, some of the male participants in particular expressed satisfaction with how  
25 the surgeon had given pre- and postoperative information and explained the operation, the  
26 consequences and likely future treatment-related effects; e.g., challenges with the stoma or the  
27 risk of impotence after the operation.  
28  
29  
30  
31

### 32 33 **Palliative chemotherapy and compassionate physicians and nurses offered hope**

34  
35  
36 When the participants started their post-surgery chemotherapy at the cancer centre, the  
37 palliative treatment was looked upon as a kind of salvation. Further treatment implied hope  
38 that something could be done. For many participants, the cancer centre was seen as “heaven”,  
39 where physicians and nurses met them with openness, knowledge and enough time. At the  
40 cancer centre, nurses and physicians gave hope, and the palliative treatment itself was also  
41 perceived as giving hope. The participants emphasized the importance of including hope in  
42 patient communication.  
43  
44  
45  
46  
47  
48  
49

50  
51  
52 *“I would like correct information about the situation. But you can give hope at the same time.*  
53 *Correct information including hope. Hope is so much.” (patient 17, woman aged 71 years).*  
54  
55

1  
2  
3 The participants' hope seemed to change from before they were diagnosed with their  
4 incurable disease and through their disease trajectory. Even though they recognized that their  
5 cancer was incurable, most hoped that they would be among those who could live for years  
6 despite poor a prognosis. As the disease progressed, they hoped for good days, not  
7 extraordinary things, or experiences. They just wanted ordinary everyday lives and the  
8 possibility of being together with family and friends. The participants wanted to continue to  
9 live and to see how things turned out.  
10  
11  
12  
13  
14  
15  
16

17  
18 *"I don't want champagne, caviar and extraordinary things or experiences. Just ordinary*  
19 *days."* (patient 3, woman aged 70 years).  
20  
21  
22  
23

#### 24 **The information given should be truthful**

25  
26 Correct and honest information about their disease, treatment effects, side-effects, metastases,  
27 and likely future perspectives was important for the participants. They preferred to receive the  
28 test results immediately rather than to wait until their next appointment at the cancer centre.  
29 Preferences regarding the amount of information that the participants wanted to receive at the  
30 time varied. Some participants wanted a total overview of their disease and prognosis from  
31 the start, some wanted a smaller amount of information at the time, while others wanted their  
32 body to tell them how their disease progressed bit by bit. Most participants found vague  
33 information confusing, and in particular some of the male participants wanted straightforward  
34 information.  
35  
36  
37  
38  
39  
40  
41  
42  
43  
44  
45

46  
47 *"I would like to know even more if it is possible. I don't want them to keep any information*  
48 *back. I would like to have a better overview and know what to expect in the future."* (patient  
49 *13, man aged 68 years)*  
50  
51  
52  
53  
54  
55

1  
2  
3 Most participants felt that they had received honest information and answers, and had  
4 opportunities to ask questions. Some felt insecure if they were treated by a junior physician  
5 who could not answer all their questions.  
6  
7

8  
9  
10 *“I would have felt safer if I was treated by a specialist, one who didn’t have to ask colleagues*  
11 *to be sure. At least occasionally.” (patient 11, man aged 60 years).*  
12  
13

14  
15 The participants experienced receiving information about their life expectancy at the cancer  
16 centre differently. Some found the information to be sufficient and adequate, while other  
17 claimed that they had been given very little specific information on this point, if anything at  
18 all. Some participants would have liked to know the exact prognosis and time, partly because  
19 they wanted to be able to “talk the serious talk” with their closest relatives and to be prepared  
20 to die. This was especially important to participants with children or vulnerable relatives. A  
21 couple of the participants expressed gratitude that the oncologists had told them their true  
22 prognosis even though they did not ask for it.  
23  
24  
25  
26  
27  
28  
29  
30  
31  
32  
33  
34

### 35 **Professional, personal, and organizational factors influenced information and** 36 **communication** 37

38  
39 Most participants wanted their health care and treatment to be organized in such a way that it  
40 was possible to see the same physician at each consultation. Some of those who had to  
41 alternate between different physicians felt that they had to start from the beginning each time  
42 and felt it to be exhausting.  
43  
44  
45  
46  
47

48  
49 *“I am an introverted person. I am not able to speak openly with everyone. When I meet a new*  
50 *physician, I have to start from the beginning, and I don’t like it. And it is OK to feel like this.*  
51 *We are all different.” (patient 2, woman aged 73 years).*  
52  
53  
54  
55

1  
2  
3 In addition to the discomfiting feeling of having to deal with new physicians, some  
4 participants reported that messages had not been forwarded between the different physicians,  
5 resulting in mistakes. They felt that no one was in charge of their medical care and felt  
6 insecure; for example, when experiencing changes in treatment when they changed  
7 physicians/junior doctors. Some of the oldest participants also expressed difficulties in  
8 understanding foreign physicians because of language problems. However, they felt  
9 comforted that their treatment was discussed in the oncologist collegium. The nurses' and  
10 physicians' professional knowledge and ability to answer questions inspired confidence. In  
11 addition, the chemotherapy treatment response was important for their confidence, hopes and  
12 trust in the treatment that they received.

13  
14  
15  
16  
17  
18  
19  
20  
21  
22  
23  
24 A combination of professional knowledge and personality was emphasized as  
25 important. Furthermore, the participants highly appreciated physicians and nurses with  
26 enough time, who knew them and their disease. One participants characterized this as follows.

27  
28  
29  
30  
31  
32 *"She is an oncologist with a heart and a brain."* (patient 4, woman 54 years).

33  
34  
35 The participants preferred nurses and physicians who telephoned to ask how they felt and  
36 gave test results or messages if any. At the same time, they appreciated the possibility of  
37 contacting the physicians and nurses at the cancer centre if needed, to have "an open door".  
38 They wanted physicians and nurses who could see them as a person, not just a patient. The  
39 importance of paying attention, making them feel that there was time enough for discussions  
40 during the consultations or visits at the cancer centre for chemotherapy, and knowing them  
41 without consulting the computer record was emphasized.

1  
2  
3 *“He saw the person. It was the warmth in his eyes and the way that he sat relaxed in his*  
4 *chair. I don’t remember anything from the consultation. I just remember the feeling.” (patient*  
5 *18, woman aged 34 years).*  
6  
7  
8  
9

10 The participants wanted to see physicians and nurses with a holistic approach to treatment and  
11 care, who also wanted to take part in their life-world, not just the physical and mechanical  
12 components related to their disease: in other words, they wanted a compassionate physician or  
13 nurse. Furthermore, characteristics of the best physicians or nurses were emphasized as  
14 knowledge, warmth, and trust. These characteristics were important for how participants felt,  
15 for their hopes and for how they handled their disease.  
16  
17  
18  
19  
20  
21  
22  
23  
24  
25  
26

## 27 **Discussion**

28  
29 Our findings reveal that most participants experienced the first information of their incurable  
30 disease as a death sentence. Later on, post-surgery palliative chemotherapy implied hope. The  
31 participants preferred truthful information about the treatment and likely future perspectives.  
32 They wanted their treatment and care to be organized in a way that they could see the same  
33 well-qualified and compassionate physicians each consultation, and the same compassionate  
34 nurses when visiting the cancer centre for chemotherapy. To deepen our understanding of the  
35 participants’ experiences and reflections, we will discuss the findings in light of previous  
36 studies of patient–HCP communications of disease and life expectancy in patients with  
37 incurable cancer, applying Løgstrup’s <sup>19</sup> philosophy and Mishler’s <sup>20</sup> focus on the patients’  
38 voice of their own life-world in patient–physician communication. We will also suggest some  
39 implications for HCPs and organizations in terms of cancer treatment and care.  
40  
41  
42  
43  
44  
45  
46  
47  
48  
49  
50  
51  
52  
53  
54  
55  
56  
57  
58  
59  
60



1  
2  
3 The physicians who informed the participants about their incurable cancer might be  
4 considered as the bearers of bad news. At that time, the participants were most likely to be in  
5 a vulnerable situation, and the relationships between the physician and the participants in  
6 these meetings were asymmetrical. The physician held the knowledge and expertise of the  
7 disease, and the participants had to trust them.<sup>8 27</sup> As Løgstrup<sup>19</sup> underlines, this makes them  
8 expose themselves to the situation, the message and the follow-up communication.<sup>28 29</sup>  
9  
10 According to our participants' experiences, the information and communication in these  
11 meetings did not give them sufficient help to handle the message and their vulnerable  
12 situation in an appropriate way. They wanted to interact with physicians who were able to  
13 give the message in a sensible and sensitive way, and who were able to have more answers  
14 and give enough time.<sup>30</sup> Additionally, as pointed out in the study by Barnett et al.<sup>18</sup>, doctors  
15 in surgical specialities are significantly more likely to be rated poorly than non-surgical  
16 specialists or GPs when breaking bad news.  
17  
18  
19  
20  
21  
22  
23  
24  
25  
26  
27  
28  
29  
30

31 The palliative treatment implied hope that something could be done. Previous studies  
32 have also underlined how palliative treatments imply hope<sup>8 31 32</sup> and how important it is to  
33 include hope when giving bleak prospects and information about palliative treatment and care.  
34  
35  
36  
37  
38  
39  
40  
41  
42  
43  
44  
45  
46  
47  
48  
49  
50  
51  
52  
53  
54  
55  
56  
57  
58  
59  
60

<sup>8</sup> Hope is an important coping strategy in such patients,<sup>33 34</sup> and hope has been described as essential in human life, and important for a person's quality of life and well-being.<sup>34</sup> Hope is the confident but uncertain expectation of a good future that appears to be realistically possible and is personally significant to the individual.<sup>35</sup> The realistic hope for most of our participants was that something could be done to relieve their symptoms and potentially to postpone death, and to enable ordinary everyday lives and the possibility of spending time with family and friends.

Time and the participants' previous experience and life situation might have influenced how they experienced the information at the cancer centre, how much they were

1  
2  
3 prepared to “fight” and which coping strategies they used. According to Lazarus and Folkman  
4  
5 <sup>29</sup> coping is a positive response to stress (such as incurable cancer disease) related to the  
6  
7 person’s cognitive and behavioural efforts to handle the stress. The process of coping includes  
8  
9 two main orientations: problem-focused and emotion-focused coping. The participants used  
10  
11 both problem-focused and emotionally focused coping strategies to handle the information  
12  
13 and communication. <sup>30</sup> However, some participants seemed to struggle with the balance  
14  
15 between these approaches using mostly an emotional coping strategy to handle troublesome  
16  
17 thoughts and worries related to their disease and situation which most likely can be  
18  
19 characterized as a part of a normal way to handle such a stressful situation. <sup>36</sup>  
20  
21

22  
23 Previous studies indicate that patients with incurable cancer want truthful information  
24  
25 about their disease, treatment, and likely future perspectives. <sup>37 38</sup> However, there are  
26  
27 individual preferences, and individual customized approaches seem to be necessary. <sup>39 40</sup> In  
28  
29 the present study this is illustrated by the diversity of how detailed information the  
30  
31 participants wanted about their disease and likely future perspectives. The individual variety  
32  
33 and preferences of the participants might be considered as an important part of their life-  
34  
35 world, which should be attended to in communication between patients and physicians or  
36  
37 nurses. <sup>19</sup> Additionally, coping orientation (problem-focused or emotion-focused), <sup>30</sup> along  
38  
39 with previous experiences, personality traits and perhaps robustness, might have influenced  
40  
41 how they experienced and preferred the information and communication.  
42  
43

44  
45 An organization of palliative treatment and care with the same well-qualified  
46  
47 physician or nurse each time they visited the cancer centre was emphasized as being  
48  
49 important for the participants to be able to feel safe and to increase the possibility of  
50  
51 individual and customized care, and to be able to open up their inner thoughts. The  
52  
53 participants seemed to prefer physician or nurse communications to include what Mishler <sup>29</sup>  
54  
55 has characterized as the “voice of medicine”, which mainly focuses on the symptoms and  
56  
57  
58  
59  
60

1  
2  
3 medical and technical problems or aspects of the disease, and they also wanted physicians and  
4  
5 nurses to initiate communication focusing on the participants' inner thoughts related to their  
6  
7 illness—what Mishler<sup>29</sup> calls the “voice of lifeworld”— including more open-ended  
8  
9 questions. Such physicians and nurses might be characterized as compassionate caregivers.  
10  
11 Compassion requires resilience, fortitude and sometimes risk-taking, but always tenacity and  
12  
13 determination.<sup>41</sup>  
14  
15

### 16 **Implications for health care**

17  
18 It might be considered to be overly demanding and tough to be the bearer of bad news of an  
19  
20 incurable disease. Some of our participants even pointed out that surgeons who are unable to  
21  
22 give the message in an appropriate way should not communicate with patients. Rogg et al.<sup>8</sup>  
23  
24 showed in their study that the Norwegian guidelines and training for physicians  
25  
26 communication of bleak prognosis were not sufficient. Further, they found that most  
27  
28 physicians reported that their education for such communication was achieved mainly through  
29  
30 observing colleagues and training.<sup>8</sup> Our findings also emphasize that training and guidance of  
31  
32 communication should be organized better not only during university studies but also in  
33  
34 hospital wards.  
35  
36  
37

38  
39 Physicians and nurses have extensive responsibilities in how they communicate with  
40  
41 patients with incurable disease. The relationship between patients and HCPs is asymmetrical.  
42  
43 The HCPs have knowledge of how the disease will most likely progress, and also common  
44  
45 psychological responses. However, the patients' inner thoughts and life-world are not  
46  
47 necessarily known to the HCP. The responsibility to initiate or invite communication on  
48  
49 patients' inner thoughts and to start communication focusing on these issues is in the hands of  
50  
51 physicians and nurses. Furthermore, it is important to strive for a more symmetrical  
52  
53  
54  
55

1  
2 relationship between patients and HPCs,<sup>19 28</sup> which will also increase the possibility of shared  
3 decision-making in treatment and care.  
4  
5

6  
7 Throughout their disease trajectory, the participants in our study preferred  
8 individualized and customized information and communication. Physicians and nurses have to  
9 be aware of, and to focus on, this whenever they inform and communicate with patients about  
10 their disease and life expectancy. This requires not only communication skills but also enough  
11 knowledge of the medical and psychological issues related to the disease and how these might  
12 progress.  
13  
14  
15  
16  
17  
18

19  
20 The participants preferred compassionate physicians and nurses. Being compassionate  
21 requires more than empathy; it requires knowledge, proactivity and interconnectedness.<sup>41</sup>  
22 Furthermore, to become a compassionate physician or nurse, training is required through  
23 observation, guidance and feedback on one's own practice.<sup>41</sup> HCPs also need to be aware of  
24 how much information each patient prefers, and this awareness is associated with years of  
25 practice and confidence. In addition, the treatment and care of patients undergoing palliative  
26 chemotherapy should be organized in such a way that patients are able to see the same well-  
27 qualified physicians and optionally also the same nurses at each consultation or visit at the  
28 cancer centre.  
29  
30  
31  
32  
33  
34  
35  
36  
37  
38  
39

#### 40 **Methodological considerations**

41  
42 The strengths of the study are that the 20 participants provided us with rich data about their  
43 experiences, feelings and reflections upon HCPs' information and communication of disease  
44 and life expectancy during their disease trajectory. The authors are two nurses and a  
45 gynaecologist treating patients with cancer, all with clinical experience and knowledge in  
46 treating and caring for several patient groups within palliative care, which were used in the  
47 discussion of the findings. Qualitative content analysis aims to stay close to the data and texts  
48  
49  
50  
51  
52  
53  
54  
55

1  
2  
3 to reveal the findings; however, the researchers' pre-understanding might also have  
4  
5 influenced the analysis of the data.  
6

7 We studied patients with one type of cancer who were in the palliative phase, which  
8  
9 can have both positive and negative implications. Variations in socio-demographic factors  
10  
11 such as gender, age, and marital status, were in accordance of patients with colorectal cancer  
12  
13 as reported in Jemal A et al.<sup>21</sup> On the other hand, studying just one patient group might also  
14  
15 limit the variance in findings that more heterogeneous groups might have brought. Although  
16  
17 our findings might not be generalizable to patients with other cancer diagnoses, the findings  
18  
19 can be transferable to hospitals with similar organisation of surgery and post-surgery  
20  
21 palliative treatments.  
22  
23

## 24 25 **Conclusions**

26  
27 These findings provide a deeper knowledge of how patients with incurable colorectal cancer  
28  
29 in the palliative phase experience and reflect upon HCP–patient communications on disease  
30  
31 and life expectancy from before the surgery through to post-surgery chemotherapy. While the  
32  
33 first receipt of information of having an incurable disease was experienced as a death  
34  
35 sentence, post-surgery palliative chemotherapy offered some hope. The participants preferred  
36  
37 individualized information about the treatment and likely future perspectives, and HCPs with  
38  
39 individualized information about the treatment and likely future perspectives, and HCPs with  
40  
41 a holistic approach, including an ability to focus on their life-world with compassion.  
42  
43  
44  
45  
46

## 47 **Authors 'contributions**

48  
49  
50 GR and IV were responsible for the study design

51  
52  
53 GR was responsible for the patient interviews and data collection  
54  
55

1  
2  
3 GR, US and IV contributed to a critical appraisal of the analyses, manuscript preparation and  
4  
5 have read and approved the final version of the manuscript.  
6  
7  
8  
9

10 **Competing interests:** The authors declare that they have no competing interests.  
11  
12  
13  
14  
15

16 **Acknowledgement:** We thank the Department of Clinical Research at Sorlandet Hospital and  
17  
18 the Faculty of Health and Sport Science, University of Agder for funding the study.  
19

20 Gudrun Rohde was a visiting researcher, as an Affiliate Academic, in the Marie Curie  
21  
22 Palliative Care Research Department, University College London, January-June 2017 while  
23  
24 writing most of the paper. We wish to thank the three patients who helped us in designing the  
25  
26 study. We also want to thank all the patients who participated.  
27  
28  
29

### 30 **References**

- 31  
32  
33 1. McRee AJ, Goldberg RM. Optimal management of metastatic colorectal cancer: current  
34 status. *Drugs* 2011;71(7):869-84.  
35 2. Cameron J, Waterworth S. Patients' experiences of ongoing palliative chemotherapy for  
36 metastatic colorectal cancer: a qualitative study. *International journal of palliative*  
37 *nursing* 2014;20(5):218-24. [published Online First: 2014/05/24]  
38 3. Cameron MG, Kersten C, Guren MG, et al. Palliative pelvic radiotherapy of symptomatic  
39 incurable prostate cancer - a systematic review. *Radiother Oncol* 2014;110(1):55-60.  
40 doi: 10.1016/j.radonc.2013.08.008 [published Online First: 2013/09/21]  
41 4. Cameron MG, Kersten C, Vistad I, et al. Palliative pelvic radiotherapy for symptomatic  
42 rectal cancer - a prospective multicenter study. *Acta Oncol* 2016;55(12):1400-07. doi:  
43 10.1080/0284186x.2016.1191666 [published Online First: 2016/06/23]  
44 5. Hancock K, Clayton JM, Parker SM, et al. Truth-telling in discussing prognosis in  
45 advanced life-limiting illnesses: a systematic review. *Palliat Med* 2007;21(6):507-17.  
46 doi: 10.1177/0269216307080823 [published Online First: 2007/09/12]  
47 6. Hagerty RG, Butow PN, Ellis PM, et al. Communicating prognosis in cancer care: a  
48 systematic review of the literature. *Ann Oncol* 2005;16(7):1005-53. doi:  
49 10.1093/annonc/mdi211 [published Online First: 2005/06/09]  
50 7. Chou WS, Hamel LM, Thai CL, et al. Discussing prognosis and treatment goals with  
51 patients with advanced cancer: A qualitative analysis of oncologists' language. *Health*  
52 *expectations : an international journal of public participation in health care and*  
53  
54  
55

- 1  
2  
3 *health policy* 2017;20(5):1073-80. doi: 10.1111/hex.12549 [published Online First:  
4 2017/03/07]
- 5 8. Rogg L, Aasland OG, Graugaard PK, et al. Direct communication, the unquestionable  
6 ideal? Oncologists' accounts of communication of bleak prognoses. *Psychooncology*  
7 2010;19(11):1221-28.
- 8 9. Martinsson L, Axelsson B, Melin-Johansson C. Patients' perception of information from  
9 physicians during palliative chemotherapy: a qualitative study. *Psychooncology*  
10 2016;14(5):495-502. doi: 10.1017/S1478951515001200
- 11 10. Murray CD, McDonald C, Atkin H. The communication experiences of patients with  
12 palliative care needs: A systematic review and meta-synthesis of qualitative findings.  
13 *Palliative & supportive care* 2015;13(2):369-83. doi: 10.1017/s1478951514000455  
14 [published Online First: 2014/05/03]
- 15 11. Butow PN, Dowsett S, Hagerty R, et al. Communicating prognosis to patients with  
16 metastatic disease: what do they really want to know? *Support Care Cancer*  
17 2002;10(2):161-8. doi: 10.1007/s005200100290 [published Online First: 2002/02/28]
- 18 12. Kirk P, Kirk I, Kristjanson LJ. What do patients receiving palliative care for cancer and  
19 their families want to be told? A Canadian and Australian qualitative study. *BMJ*  
20 2004;328(7452):1343. doi: 10.1136/bmj.38103.423576.55 [published Online First:  
21 2004/05/21]
- 22 13. Clayton JM, Butow PN, Arnold RM, et al. Fostering coping and nurturing hope when  
23 discussing the future with terminally ill cancer patients and their caregivers. *Cancer*  
24 2005;103(9):1965-75. doi: 10.1002/cncr.21011 [published Online First: 2005/03/25]
- 25 14. Clayton JM, Butow PN, Arnold RM, et al. Discussing life expectancy with terminally ill  
26 cancer patients and their carers: a qualitative study. *Support Care Cancer*  
27 2005;13(9):733-42. doi: 10.1007/s00520-005-0789-4 [published Online First:  
28 2005/03/12]
- 29 15. Stajduhar KI, Thorne SE, McGuinness L, et al. Patient perceptions of helpful  
30 communication in the context of advanced cancer. *J Clin Nurs* 2010;19(13-14):2039-  
31 47. doi: 10.1111/j.1365-2702.2009.03158.x [published Online First: 2010/10/06]
- 32 16. Richardson J. Health promotion in palliative care: the patients' perception of therapeutic  
33 interaction with the palliative nurse in the primary care setting. *J Adv Nurs*  
34 2002;40(4):432-40. [published Online First: 2002/11/08]
- 35 17. Kutner JS, Steiner JF, Corbett KK, et al. Information needs in terminal illness. *Soc Sci*  
36 *Med* 1999;48(10):1341-52. [published Online First: 1999/06/16]
- 37 18. Barnett MM. Effect of breaking bad news on patients' perceptions of doctors. *Journal of*  
38 *the Royal Society of Medicine* 2002;95(7):343-7. [published Online First: 2002/07/02]
- 39 19. Løgstrup KE. The ethical demand. Notre Dame, Ill: University of Notre Dame Press 1997.
- 40 20. Mishler EG. The Discourse of Medicine - Dialectics of Medical Interviews 1984.
- 41 21. Jemal A, Center MM, DeSantis C, et al. Global patterns of cancer incidence and mortality  
42 rates and trends. *Cancer Epidemiol Biomarkers Prev* 2010;19(8):1893-907. doi:  
43 10.1158/1055-9965.epi-10-0437 [published Online First: 2010/07/22]
- 44 22. Crabtree BF, Miller WL. Doing qualitative research. Thousand Oaks, Calif.: Sage 1999.
- 45 23. Earle V. Phenomenology as research method or substantive metaphysics? An overview of  
46 phenomenology's uses in nursing. *NursPhilos* 2010;11(4):286-96.
- 47 24. Polit DF. Essentials of nursing research: methods, appraisal, and utilization. Philadelphia:  
48 Lippincott Williams & Wilkins 2006.
- 49 25. Beauchamp TL, Childress JF. Principles of biomedical ethics. 7th ed. ed. New York:  
50 Oxford University Press 2013.
- 51  
52  
53  
54  
55

- 1
  - 2
  - 3
  - 4
  - 5
  - 6
  - 7
  - 8
  - 9
  - 10
  - 11
  - 12
  - 13
  - 14
  - 15
  - 16
  - 17
  - 18
  - 19
  - 20
  - 21
  - 22
  - 23
  - 24
  - 25
  - 26
  - 27
  - 28
  - 29
  - 30
  - 31
  - 32
  - 33
  - 34
  - 35
  - 36
  - 37
  - 38
  - 39
  - 40
  - 41
  - 42
  - 43
  - 44
  - 45
  - 46
  - 47
  - 48
  - 49
  - 50
  - 51
  - 52
  - 53
  - 54
  - 55
  - 56
  - 57
  - 58
  - 59
  - 60
26. WMA Declaration of Helsinki. Ethical Principles for Medical Research Involving Human Subjects 2013 [Available from: <http://www.wma.net/en/30publications/10policies/b3/>].
27. Rogg L, Loge JH, Aasland OG, et al. Physicians' attitudes towards disclosure of prognostic information: a survey among a representative cross-section of 1605 Norwegian physicians. *Patient Educ Couns* 2009;77(2):242-7. doi: 10.1016/j.pec.2009.03.007 [published Online First: 2009/04/10]
28. Friedrichsen MJ, Strang PM, Carlsson ME. Breaking bad news in the transition from curative to palliative cancer care--patient's view of the doctor giving the information. *Support Care Cancer* 2000;8(6):472-8. [published Online First: 2000/11/30]
29. G ME. *The Discourse of Medicine - Dialectics of Medical Interviews*. New Jersey: Ablex Publishing Corporation, Norwood, New Jersey 1984.
30. Lazarus RS, Folkman S. *Stress, appraisal, and coping*. New York: Springer 1984.
31. Parker SM, Clayton JM, Hancock K, et al. A systematic review of prognostic/end-of-life communication with adults in the advanced stages of a life-limiting illness: patient/caregiver preferences for the content, style, and timing of information. *J Pain Symptom Manage* 2007;34(1):81-93. doi: 10.1016/j.jpainsymman.2006.09.035 [published Online First: 2007/05/29]
32. Benzein E, Norberg A, Saveman BI. The meaning of the lived experience of hope in patients with cancer in palliative home care. *Palliat Med* 2001;15(2):117-26. [published Online First: 2001/04/17]
33. Hegarty M. The Dynamic of Hope: Hoping in the Face of Death. *Progress in Palliative Care* 2001;9(2):42-46. doi: 10.1080/09699260.2001.11746903
34. Rustoen T. Hope and quality of life, two central issues for cancer patients: a theoretical analysis. *Cancer Nurs* 1995;18(5):355-61. [published Online First: 1995/10/01]
35. Dufault K, Martocchio BC. Symposium on compassionate care and the dying experience. Hope: its spheres and dimensions. *Nurs Clin North Am* 1985;20(2):379-91. [published Online First: 1985/06/01]
36. Folkman S. Positive psychological states and coping with severe stress. *Soc Sci Med* 1997;45(8):1207-21. doi: 10.1016/S0277-9536(97)00040-3
37. Miccinesi G, Bianchi E, Brunelli C, et al. End-of-life preferences in advanced cancer patients willing to discuss issues surrounding their terminal condition. *Eur J Cancer Care (Engl)* 2012;21(5):623-33. doi: 10.1111/j.1365-2354.2012.01347.x [published Online First: 2012/04/24]
38. Hagerty RG, Butow PN, Ellis PA, et al. Cancer patient preferences for communication of prognosis in the metastatic setting. *J Clin Oncol* 2004;22(9):1721-30. doi: 10.1200/jco.2004.04.095 [published Online First: 2004/05/01]
39. Mackenzie LJ, Carey ML, Paul CL, et al. Do we get it right? Radiation oncology outpatients' perceptions of the patient centredness of life expectancy disclosure. *Psychooncology* 2013;22(12):2720-8. doi: 10.1002/pon.3337 [published Online First: 2013/06/27]
40. Walczak A, Butow PN, Davidson PM, et al. Patient perspectives regarding communication about prognosis and end-of-life issues: how can it be optimised? *Patient Educ Couns* 2013;90(3):307-14. doi: 10.1016/j.pec.2011.08.009 [published Online First: 2011/09/17]
41. Larkin PJ. *Compassion - The Essence of Palliative and End-of-life Care*. First ed. New York: Oxford University Press 2016.



**Table 1:** Characteristics of patients receiving non-curative chemotherapy.

|                                                  | First-line ( <i>n</i> = 12) | Second-line ( <i>n</i> = 8) |
|--------------------------------------------------|-----------------------------|-----------------------------|
| Women                                            | 5                           | 3                           |
| Men                                              | 7                           | 5                           |
| Mean age (range), years                          | 63 (34–75)                  | 69 (64–75)                  |
| Marital status:                                  |                             |                             |
| Married/cohabiting                               | 10                          | 8                           |
| Single                                           | 1                           |                             |
| Widow/widower                                    | 1                           |                             |
| Chemotherapy used:                               |                             |                             |
| Fliri/bevacizumab                                | 10                          |                             |
| Flox (5-fluorouracil, folinic acid, axaliplatin) | 1                           | 8                           |
| Capecitabine plus oxaliplatin (Xelox)            | 1                           |                             |

All patients received 5-fluorouracil-based combination chemotherapy with irinotecan or oxaliplatin, +/- bevacizumab.

**Table 1**

Consolidated criteria for reporting qualitative studies (COREQ): 32-item checklist

| No                                             | Item                                     | Guide questions/description                                                           |
|------------------------------------------------|------------------------------------------|---------------------------------------------------------------------------------------|
| <b>Domain 1: Research team and reflexivity</b> |                                          |                                                                                       |
| Personal Characteristics                       |                                          |                                                                                       |
| 1.                                             | Interviewer/facilitator                  | G Rohde (All interviews), p 7                                                         |
| 2.                                             | Credentials                              | PhD and professors, p 1                                                               |
| 3.                                             | Occupation                               | Professors, p 1                                                                       |
| 4.                                             | Gender                                   | All female, p 7                                                                       |
| 5.                                             | Experience and training                  | All were trained researchers, p 7                                                     |
| Relationship with participants                 |                                          |                                                                                       |
| 6.                                             | Relationship established                 | No relationship before the interviews, p 7                                            |
| 7.                                             | Participant knowledge of the interviewer | The participants did not know the interviewer, p 7                                    |
| 8.                                             | Interviewer characteristics              | Nurse and professor and had interests for the topic, p 7                              |
| <b>Domain 2: study design</b>                  |                                          |                                                                                       |
| Theoretical framework                          |                                          |                                                                                       |
| 9.                                             | Methodological orientation and Theory    | Content analysis, p7                                                                  |
| Participant selection                          |                                          |                                                                                       |
| 10.                                            | Sampling                                 | The patients physicians asked if the researcher could contact them for inclusion, p 6 |
| 11.                                            | Method of approach                       | Face-to-face, p 7                                                                     |
| 12.                                            | Sample size                              | Twenty patients (Twelve men and eight women), p 6                                     |

| No                                      | Item                           | Guide questions/description                                                                  |
|-----------------------------------------|--------------------------------|----------------------------------------------------------------------------------------------|
| 13.                                     | Non-participation              | We have limited information about this, p 6                                                  |
| Setting                                 |                                |                                                                                              |
| 14.                                     | Setting of data collection     | Out-patient clinic and patients home (one patient), p 7                                      |
| 15.                                     | Presence of non-participants   | Non, p 6                                                                                     |
| 16.                                     | Description of sample          | Patients with metastatic colorectal cancer receiving non-curative chemotherapy, p 6          |
| Data collection                         |                                |                                                                                              |
| 17.                                     | Interview guide                | The interview guide was made by the researchers, p 7 and 8                                   |
| 18.                                     | Repeat interviews              | No repeated interviews were performed, p 7                                                   |
| 19.                                     | Audio/visual recording         | Audio recording was used to collect the data, p 7                                            |
| 20.                                     | Field notes                    | Field notes were made after the interviews, not stated in the manuscript                     |
| 21.                                     | Duration                       | 50-100 minutes, p 7                                                                          |
| 22.                                     | Data saturation                | Data saturation was discussed and reached, p 7                                               |
| 23.                                     | Transcripts returned           | The transcripts were not returned to participants for comments, not stated in the manuscript |
| <b>Domain 3: analysis and findingsz</b> |                                |                                                                                              |
| Data analysis                           |                                |                                                                                              |
| 24.                                     | Number of data coders          | one, p 8                                                                                     |
| 25.                                     | Description of the coding tree | The authors provided a description of the coding, p 8                                        |
| 26.                                     | Derivation of themes           | The themes were derived from the data, p 8                                                   |

| No        | Item                         | Guide questions/description                                                              |
|-----------|------------------------------|------------------------------------------------------------------------------------------|
| 27.       | Software                     | none                                                                                     |
| 28.       | Participant checking         | The participants did not provide feedback on the findings, not written in the manuscript |
| Reporting |                              |                                                                                          |
| 29.       | Quotations presented         | The quotations presented illustrate the themes / findings, p 9 - 14                      |
| 30.       | Data and findings consistent | There was consistency between the data presented and the findings p 8 - 14               |
| 31.       | Clarity of major themes      | Major themes were clearly presented in the findings, p 8                                 |
| 32.       | Clarity of minor themes      | No                                                                                       |

# BMJ Open

## Communication of disease prognosis and life expectancy in patients with colorectal cancer undergoing palliative care: a qualitative study

|                                 |                                                                                                                                                                                                                                                                                                                                                                                      |
|---------------------------------|--------------------------------------------------------------------------------------------------------------------------------------------------------------------------------------------------------------------------------------------------------------------------------------------------------------------------------------------------------------------------------------|
| Journal:                        | <i>BMJ Open</i>                                                                                                                                                                                                                                                                                                                                                                      |
| Manuscript ID                   | bmjopen-2018-023463.R1                                                                                                                                                                                                                                                                                                                                                               |
| Article Type:                   | Research                                                                                                                                                                                                                                                                                                                                                                             |
| Date Submitted by the Author:   | 13-Jul-2018                                                                                                                                                                                                                                                                                                                                                                          |
| Complete List of Authors:       | Rohde, Gudrun; University of Agder, Faculty of Health and Sport Sciences; Sorlandet Hospital , Department of Clinical Research Söderhamn, Ulrika; University of Agder, Centre for Caring Research – Southern Norway, Department of Health and nursing Sciences, Faculty of Health and Sport Sciences<br>Vistad, Ingvild ; Sorlandet Hospital Kristiansand , Obstetric and gynecology |
| <b>Primary Subject Heading</b>: | Palliative care                                                                                                                                                                                                                                                                                                                                                                      |
| Secondary Subject Heading:      | Communication                                                                                                                                                                                                                                                                                                                                                                        |
| Keywords:                       | palliative care information, vulnerability, life-world, compassion                                                                                                                                                                                                                                                                                                                   |
|                                 |                                                                                                                                                                                                                                                                                                                                                                                      |

SCHOLARONE™  
Manuscripts

1  
2  
3  
4 **Communication of disease prognosis and life expectancy in patients with**  
5  
6 **colorectal cancer undergoing palliative care: a qualitative study**  
7  
8  
9

10  
11  
12 **Authors:**

13  
14 Gudrun Rohde, PhD (Corresponding author)

15  
16 Professor, University of Agder, Faculty of Health and Sport Sciences and Department of  
17  
18 Clinical Research, Sorlandet Hospital Kristiansand

19  
20 Postbox 422, 4604 Kristiansand, Norway

21  
22 Phone: +47 99164094

23  
24 Email: ([gudrun.e.rohde@uia.no](mailto:gudrun.e.rohde@uia.no))  
25  
26  
27  
28

29  
30 Ulrika Söderhamn, PhD

31  
32 Professor

33  
34 University of Agder, Faculty of Health and Sport Sciences

35  
36 Postbox 509

37  
38 4898 Grimstad, Norway

39  
40 Phone: +47 416 98 753

41  
42 Email: [Ulrika.soderhamn@uia.no](mailto:Ulrika.soderhamn@uia.no)  
43  
44  
45  
46

47  
48 Ingvild Vistad, MD PhD

49  
50 Department of Obstetrics and Gynecology, Sorlandet Hospital HF, Kristiansand

51  
52 Gynaecologist and Professor

53  
54 Postbox 416, 4604 Kristiansand, Norway  
55

1  
2  
3 Phone: +47 97532316  
4

5 Email: [Ingvild.vistad@sshf.no](mailto:Ingvild.vistad@sshf.no)  
6  
7  
8  
9  
10  
11  
12  
13  
14  
15  
16  
17  
18  
19  
20  
21  
22  
23  
24  
25  
26  
27  
28  
29  
30  
31  
32  
33  
34  
35  
36  
37  
38  
39  
40  
41  
42  
43  
44  
45  
46  
47  
48  
49  
50  
51  
52  
53  
54  
55

For peer review only

**Abstract:**

**Objectives** Patients with colorectal cancer undergoing palliative treatment receive extensive amounts of treatment-related information throughout their disease trajectory. We aimed to explore the experiences of patients with incurable colorectal cancer and their reflections upon information given by physicians and nurses while in palliative care. Our main focus was the patients' thoughts about how disease information and life expectancy were communicated, from the first time that they were informed about the incurable nature of their disease through to post-surgery palliative treatment.

**Settings** Patients with colorectal cancer receiving palliative chemotherapy.

**Research design** We used a qualitative approach, and the data were analysed according to qualitative content analysis.

**Participants** Twenty patients (34–75 years of age) were included in the study: 12 received first-line chemotherapy, and eight received second-line chemotherapy. Eleven patients were treated by oncologists, and nine were treated by junior physicians.

**Results** Through data-driven empirical analysis, we identified four themes: (1) insufficient initial information, (2) palliative chemotherapy and compassionate physicians and nurses offered hope, (3) the information given should be truthful and (4) professional, personal and organizational factors influenced information and communication.

**Conclusion** Receiving the first information of having an incurable disease was experienced as insufficient, while post-surgery palliative chemotherapy offered hope. The patients preferred customized information about treatment and likely future perspectives, and doctors and nurses with a holistic approach focusing on their life-world with compassion.

**Implication for Practice** To be a sensitive, holistic, and compassionate physician or nurse requires knowledge and confidence. To achieve this, training and guidance at universities and in hospitals are needed.



### Strengths and limitations of the study

- A strength is that the study shows palliative colorectal cancer patients' thoughts about how disease information, prognoses and life expectancy were communicated, from the first time that they were informed about the incurable nature of the disease *through* to post-surgery treatment.
- The study highlights palliative colorectal patients' preferences for professional, personal, and organizational factors facilitating or inhibiting communication.
- It can be seen as a limitation to focus on one group of patients in palliative care, because it can limit the variance in findings that more heterogeneous groups might have brought.
- The patients were interviewed during chemotherapy at one time point only and their memory about first information may have been coloured by later experiences.

**Key words:** palliative care information; vulnerability; life-world, compassion

**Words:** 4401

## Background

Patients with cancer treated with palliative intent receive extensive amounts of disease-related information from the first time they are informed about the incurable nature of their disease, through the following months or even years with treatment and care.<sup>1-4</sup> Guidelines encourage health care professionals (HCPs) such as physicians and nurses to inform and discuss prognoses and likely future perspectives with the patients. However, many HCPs and patients struggle with the right approach for these discussions.<sup>5-7</sup> In a systematic review in 2007, Hancock et al.<sup>5</sup> showed that although most HCPs believed that patients should be told the truth about their prognosis, in practice, many either avoid discussing the topic or withhold information. Other studies have emphasized that primarily focusing on open communication regarding the bleak prospects of life expectancy entails a risk of overrunning the individual's information needs and hopes.<sup>8</sup> Further, Chen et al.<sup>9</sup> showed that about half of cancer patients with advanced disease accurately understood their prognosis. In-depth studies on patients' experiences about information given by physicians throughout the disease trajectory are needed in order to guide HCP how to communicate palliative patients' diagnosis and life-expectancy.

Most studies focusing on patient–HCP communication of disease and prognosis in patients with incurable cancer are quantitative involving patients in an early stage of the disease.<sup>6</sup> Qualitative studies show diverging results regarding the patient's acceptance of the chronic and incurable nature of their disease, and the presentation of their prognosis<sup>10-16</sup>. Patients prefer communication with caring and trusting HCPs.<sup>12 13 16</sup> Furthermore, patients emphasize personal and professional knowledge of the nurses as being important in palliative care,<sup>17</sup> and their information needs are both disease and illness oriented.

Patients with cancer in a palliative phase of treatment are vulnerable, and good patient–HCP relationships are important.<sup>18</sup> The philosopher Løgstrup<sup>19</sup> emphasized the

1  
2 importance of trust in such relationships. Trust is something fundamental in our lives and  
3 implies that you expose yourself to others and become vulnerable. Vulnerability implies that  
4 others are in control and hold some of their fellow humans' life in their hands.<sup>19</sup> Furthermore,  
5 Mishler<sup>20</sup> distinguished between the voice of medicine (the technical–scientific assumptions  
6 of medicine) and the voice of the life-world (the natural attitudes of everyday life), which  
7 represent different ways of conceptualizing and understanding patients' problems in patient–  
8 physician communication. He suggested an increased attentiveness to the voice of the patients  
9 in terms of their life-world, especially in vulnerable patients like patients in palliative care.

10  
11  
12  
13  
14  
15  
16  
17  
18  
19  
20 Patients with incurable cancer often experience a life crisis when they are informed  
21 about the incurable nature of their cancer.<sup>21</sup> Over time, the majority adjust to their new life  
22 situation, and during this time, preferences and experiences regarding information and  
23 communication might change.<sup>18</sup> Colorectal cancer patients represent one of the most common  
24 cancer types<sup>21 22</sup> and there is limited knowledge of how this patient group look upon  
25 information and communication of disease and life expectancy *throughout* the disease  
26 trajectory, as most studies include heterogeneous groups of patients. There is also scarce  
27 knowledge of professional, personal, and especially organizational factors facilitating or  
28 inhibiting communication. Therefore, we aimed to explore the experiences of patients with  
29 incurable colorectal cancer and their reflections upon information given by physicians and  
30 nurses while in palliative care. Our main focus was the patients' thoughts about how disease  
31 information, prognoses and life expectancy were communicated, from the first time that they  
32 were informed about the incurable nature of the disease through to post-surgery palliative  
33 treatment.

## Methods

We chose a qualitative inductive approach using in-depth interviews.<sup>23</sup> As a part of a larger study<sup>24</sup> we invited patients with metastatic colorectal cancer who were referred for palliative chemotherapy at three regional hospitals in Southern Norway. Oncologists informed patients at the outpatient clinics about the study when they attended for the second or third cycle of chemotherapy. Surgery is performed at the surgery department, with surgeons being responsible for the patients in this phase. Chemotherapy is provided at an oncological outpatient clinic with oncologists being responsible for the treatment.

The patients were eligible for inclusion if they were aged 18 years or older, had metastatic colorectal cancer, were undergoing surgery for their cancer, had been referred for first- or second-line palliative chemotherapy, had a life expectancy of >6 months and were able to give written informed consent. We included patients of different ages, marital statuses and other demographic and clinical characteristics.<sup>25</sup> We excluded patients with any significant comorbidity that could compromise life expectancy, or inability to understand or read Norwegian. Patients with conditions that the physician believed could affect the patient's ability to understand or cope with the questions were not considered to be eligible, including patients who were considered to be too emotionally vulnerable ( $n = 4$ ). The patients were included consecutively.

Twenty patients with colorectal cancer (34–75 years of age) were invited to participate in the study over a period of 1 year, and all of them accepted the invitation. All patients received combination chemotherapy (see Table 1) and had few physical symptoms related to their disease. The sample comprised 12 patients receiving first-line chemotherapy (five women and seven men) and eight receiving second-line chemotherapy (three women and five men). Eleven patients were treated by oncologists, and nine were treated by junior physicians.

<Table 1 about here>

## Data collection

The same researcher (GR) conducted all the interviews. At 2–4 days after the interview, GR contacted the patient and asked whether the interview had influenced him or her negatively. No patients experienced a negative influence or reaction. We performed in-depth interviews lasting 50–100 minutes using a semi-structured interview guide to ensure that we included the issues in focus<sup>23</sup> and asked questions such as the following. “What do you think about the first information that you received about your disease and the prognosis?” “How was the information provided about the follow-up chemotherapy and likely future perspectives?” “Have you received the information as you expected or is there anything missing?” “What are important when giving disease information and prognosis, and how do you want it to be given/delivered?” After the 11<sup>th</sup> interview, we did some preliminary analyses and made minor changes to the interview guide to obtain more data on issues that needed to be expanded to answer the research aim; for example, “What characterized the good information that you received versus other information that you were not happy with?” Patients were included until data saturation was achieved, indicated by minor new information in interview 19 and 20.<sup>23</sup> One interview took place at the patient’s home. The other interviews took place at the cancer centre or outpatient clinics, at a time when the patients had an appointment. The researchers did not know the patients before the interviews and did not treat the patients.

## Analysis

We audiotaped and transcribed the interviews verbatim and made logs after each interview. The data were analysed according to qualitative content analysis to identify the themes in the data. In the discussion, our findings were interpreted in light of the researchers’ previous understanding and theory. GR and US are both nurses and professors in health sciences with

1  
2  
3 clinical experience in palliative care. IV is a gynaecologist and professor, also with extensive  
4  
5 experience in treating patients with cancer undergoing palliative care.  
6

7 In the analyses, we (i) read all the interviews to understand the meaning of the whole  
8  
9 text, (ii) investigated sentences or sections to expose their meaning and to facilitate the  
10  
11 identification of themes, (iii) related sentences or sections to the meaning of the whole text  
12  
13 and (iv) identified passages representative of shared understandings between the researchers  
14  
15 and participants. To support the analysis, we created mind maps and discussed the analysis  
16  
17 among the authors. The analysis steps were followed carefully, which increases the reliability  
18  
19 of the study. Quotations have been used to illustrate and support the findings, and by that  
20  
21 increasing the trustworthiness. To validate the findings, all authors participated in discussions  
22  
23 of the empirical analysis and in writing up the findings.  
24  
25

## 26 27 **Ethics**

28  
29  
30 Voluntariness and confidentiality were assured during the collection, handling and reporting  
31  
32 of data.<sup>26 27</sup> The study was approved by the Regional Committee for Medical Research Ethics  
33  
34 (REK South-East 2011/2464).  
35  
36  
37

## 38 39 **Patient involvement**

40  
41 Before we started the study, we performed three pilot-interviews with cancer patients to test  
42  
43 the study design and interview-guide, and we made minor changes to the guide. These  
44  
45 interviews are not included in the study. No further patients' involvement was undertaken  
46  
47 when it comes to the specific aims or interpretation of the findings. The dissemination of the  
48  
49 findings will be this publication.  
50  
51  
52  
53  
54  
55

## Findings

Through data-driven empirical analysis, we identified four themes: (1) insufficient initial information, (2) palliative chemotherapy and compassionate physicians and nurses offered hope, (3) the information given should be truthful and (4) professional, personal and organizational factors influenced information and communication. We did not identify any differences between participants receiving first- or second-line chemotherapy.

### Insufficient initial information

The participants experienced receiving information about the incurable nature of their cancer differently, and the information was given in different settings. Some had to wait a long time (weeks or months) from their first worries about the disease until they could be examined or have an appointment at the hospital. When the cancer was finally diagnosed, they received limited apologies from the physicians because of the delay and emphasized that an excuse would have made the situation easier to handle. Some had not even felt particularly ill, and it was hard for them to understand the message about having an incurable disease when the doctor informed them. Most participants were informed about their diagnosis by surgeons, except for two who were informed by their general practitioners (GPs). Several participants experienced the first information about the incurable nature of their disease as a shock.

*“When the surgeon gave me the message that my disease was incurable, I was shocked, I didn’t feel that anything was wrong. I asked him how long I had left to live. He just shrugged and didn’t have any answer. The conversation took 8 minutes.” (patient 4, woman aged 54 years).*

Some participants reported that surgeons or GPs had given the message in an inappropriate way, at an inappropriate place (e.g., in a small examination room). Further

1  
2  
3 questions from the participants were answered only to a limited extent, if at all. It was tough  
4  
5 to be told that their cancer could not be cured. The message was experienced as a death  
6  
7 sentence, and several participants felt left behind with unanswered questions.  
8  
9

10  
11 *“It is important to tell the truth, but in an appropriate way. Go home and die. That is not*  
12  
13 *appropriate” (patient 4, woman aged 54 years)*  
14

15  
16  
17 Although the message was brutal to hear, some participants admitted that a straightforward  
18  
19 message was probably the best way.  
20  
21

22 Some participants experienced that the information before and after the operation was  
23  
24 insufficient. They would have liked more answers and adequate communication with the  
25  
26 surgeon. A couple of participants received a message that complete tumour resection was  
27  
28 impossible or that nearly nothing could be done  
29  
30

31  
32 *“She (the surgeon) should not talk with people. Or learn a phrase telling the patients that*  
33  
34 *other HCPs will talk with you about this.” (patient 4, woman aged 54 years).*  
35  
36

37 On the other hand, some of the male participants in particular expressed satisfaction with how  
38  
39 the surgeon had given pre- and postoperative information and explained the operation, the  
40  
41 consequences and likely future treatment-related effects; e.g., challenges with the stoma or the  
42  
43 risk of impotence after the operation.  
44  
45  
46  
47  
48

### 49 **Palliative chemotherapy and compassionate physicians and nurses offered hope**

50  
51 When the participants started their post-surgery chemotherapy at the cancer centre further  
52  
53 treatment implied hope that something could be done. At the cancer centre the participants  
54  
55



1  
2  
3 were met with openness, knowledge and enough time. Nurses and physicians gave hope, and  
4  
5 the palliative treatment itself was also perceived as giving hope.  
6  
7

8  
9 *“When I received the appointment for palliative chemotherapy I was relieved, something*  
10  
11 *could be done” (patient 3, woman aged 74 years)*  
12  
13

14  
15 Furthermore, the participants emphasized the importance of including hope in patient  
16  
17 communication.  
18  
19

20  
21  
22 *“She looks at you. She gives hope. That is how I want to be met” (Patient 4, woman aged 54*  
23  
24 *years)*  
25  
26

27  
28 The participants’ hope seemed to change from before they were diagnosed with their  
29  
30 incurable disease and through their disease trajectory. Even though they recognized that their  
31  
32 cancer was incurable, most hoped that they would be among those who could live for years  
33  
34 despite poor a prognosis. As the disease progressed, they hoped for good days, not  
35  
36 extraordinary things, or experiences. They just wanted ordinary everyday lives and the  
37  
38 possibility of being together with family and friends. The participants wanted to continue to  
39  
40 live and to see how things turned out.  
41  
42

43  
44  
45 *“I look forward to spring when the wagtail comes back outside my house” (patient 1, man*  
46  
47 *aged 67 years).*  
48  
49

### **The information given should be truthful**

Correct and truthful information about their disease, treatment effects, side-effects, metastases, and likely future perspectives was important for the participants. They preferred to receive the test results immediately rather than to wait until their next appointment at the cancer centre.

*«There were minor changes after the last computer tomography. The oncologist telephoned and told the results. I didn't have to wait for the next appointment, I didn't have to worry until then» (patient 17, woman aged 71 years)*

Preferences regarding the amount of information that the participants wanted to receive at the time varied. Some participants wanted a total overview of their disease and prognosis from the start, some wanted a smaller amount of information at the time, while others wanted their body to tell them how their disease progressed.

*«I don't want to know the exact date. I would like information about disease progress and prognosis bit by bit, or let my body tell me bit by bit» (patient 17, woman aged 71 years)*

Most participants found vague information confusing, and in particular some of the male participants wanted straightforward information.

*«I would like to know even more if it is possible. I don't want them to keep any information back. I would like to have a better overview and know what to expect in the future.» (patient 13, man aged 68 years)*

1  
2  
3 Most participants felt that they had received honest information and answers and had  
4 opportunities to ask questions. Some felt insecure if they were treated by a junior physician  
5 who could not answer all their questions.  
6  
7

8  
9  
10 *“I would have felt safer if I was treated by a specialist, one who didn’t have to ask colleagues*  
11 *to be sure. At least occasionally.” (patient 11, man aged 60 years).*  
12  
13

14  
15 The participants experienced receiving information about their life expectancy at the cancer  
16 centre differently. Some found the information to be sufficient and adequate, while other  
17 claimed that they had been given very little specific information on this point, if anything at  
18 all.  
19

20  
21  
22 *“They haven’t said much about life expectancy. However, the treatment is palliative. They*  
23 *haven’t given me the time. And I haven’t asked » (patient 7, man aged 63 years)*  
24  
25

26  
27  
28 Some participants would have liked to know the exact prognosis and time, partly because they  
29 wanted to be able to “talk the serious talk” with their closest relatives and to be prepared to  
30 die. This was especially important to participants with children or vulnerable relatives. A  
31 couple of the participants expressed gratitude that the oncologists had told them their true  
32 prognosis even though they did not ask for it.  
33  
34  
35  
36  
37  
38  
39  
40  
41  
42

### 43 **Professional, personal, and organizational factors influenced information and** 44 **communication** 45

46  
47 Most participants wanted their health care and treatment to be organized in such a way that it  
48 was possible to see the same physician at each consultation. Some of those who had to  
49 alternate between different physicians felt that they had to start from the beginning each time  
50 and felt it to be exhausting.  
51  
52  
53  
54  
55

1  
2  
3 *“I am an introverted person. I am not able to speak openly with everyone. When I meet a new*  
4 *physician, I have to start from the beginning, and I don’t like it. And it is OK to feel like this.*  
5 *We are all different.” (patient 2, woman aged 73 years).*  
6  
7  
8  
9

10 In addition to the discomfiting feeling of having to deal with new physicians, some  
11 participants reported that messages had not been forwarded between the different physicians,  
12 resulting in mistakes. They felt that no one was in charge of their medical care and felt  
13 insecure; for example, when experiencing changes in treatment when they changed  
14 physicians/junior doctors. Some of the oldest participants also expressed difficulties in  
15 understanding foreign physicians because of language problems. However, they felt  
16 comforted that their treatment was discussed in the oncologist collegium. The nurses’ and  
17 physicians’ professional knowledge and ability to answer questions inspired confidence.  
18  
19  
20  
21  
22  
23  
24  
25  
26

27 A combination of professional knowledge and personality was emphasized as  
28 important. Furthermore, the participants highly appreciated physicians and nurses with  
29 enough time, who knew them and their disease. One participants characterized this as follows.  
30  
31  
32  
33  
34

35 *“She is an oncologist with a heart and a brain.” (patient 4, woman 54 years).*  
36  
37

38 The participants preferred nurses and physicians who telephoned to ask how they felt and  
39 gave test results or messages if any. At the same time, they appreciated the possibility of  
40 contacting the physicians and nurses at the cancer centre if needed, to have “an open door”.  
41  
42  
43  
44 They wanted physicians and nurses who could see them as a person, not just a patient. The  
45 importance of paying attention, making them feel that there was time enough for discussions  
46 during the consultations or visits at the cancer centre for chemotherapy, and knowing them  
47 without consulting the computer record was emphasized.  
48  
49  
50  
51  
52  
53  
54  
55  
56  
57  
58  
59  
60

1  
2  
3 *“He saw the person. It was the warmth in his eyes and the way that he sat relaxed in his*  
4 *chair. I don’t remember anything from the consultation. I just remember the feeling.” (patient*  
5 *18, woman aged 34 years).*  
6  
7  
8  
9

10 The participants wanted to see physicians and nurses with a holistic approach to treatment and  
11 care, who also wanted to take part in their life-world, not just the physical and mechanical  
12 components related to their disease: in other words, they wanted a compassionate physician or  
13 nurse. Furthermore, characteristics of the best physicians or nurses were emphasized as  
14 knowledge, warmth, and trust. These characteristics were important for how participants felt,  
15 for their hopes and for how they handled their disease.  
16  
17  
18  
19  
20  
21  
22  
23  
24  
25  
26

## 27 **Discussion**

28  
29 To our best knowledge this is the first study to explore palliative colorectal cancer patients’  
30 thoughts about how disease information, prognoses and life expectancy were communicated,  
31 from the first time that they were informed about the incurable nature of the disease  
32 *throughout* to post-surgery palliative treatment. Our findings reveal that there seem to be a  
33 change during the disease trajectory. Most of our participants experienced the first  
34 information of their incurable disease as insufficient. Later on, post-surgery palliative  
35 chemotherapy implied hope. The participants preferred truthful information about the  
36 treatment and likely future perspectives. They wanted their treatment and care to be organized  
37 in a way that they could see the same well-qualified and compassionate physicians each  
38 consultation, and the same compassionate nurses when visiting the cancer centre for  
39 chemotherapy. To deepen our understanding of the participants’ experiences and reflections,  
40 we will discuss the findings in light of previous studies of patient–HCP communications of  
41  
42  
43  
44  
45  
46  
47  
48  
49  
50  
51  
52  
53  
54  
55

1  
2 disease and life expectancy in patients with incurable cancer, applying Løgstrup's<sup>19</sup>  
3 philosophy and Mishler's<sup>20</sup> focus on the patients' voice of their own life-world in patient-  
4 physician communication. We will also suggest some implications for HCPs and  
5 organizations in terms of cancer treatment and care.  
6  
7  
8  
9  
10

11 The physicians who informed the participants about their incurable cancer might be  
12 considered as the bearers of bad news. Initially, the participants were most likely to be in a  
13 vulnerable situation, and the relationships between the physician and the participants in these  
14 meetings were asymmetrical. The physician held the knowledge and expertise of the disease,  
15 and the participants had to trust them.<sup>8,28</sup> As Løgstrup<sup>19</sup> underlines, this makes them expose  
16 themselves to the situation, the message and the follow-up communication.<sup>29,30</sup> According to  
17 our participants' experiences, the information and communication in these meetings did not  
18 give them sufficient help to handle the message and their vulnerable situation in an  
19 appropriate way. They wanted to interact with physicians who were able to give the message  
20 in a sensible and sensitive way, and who were able to have more answers and give enough  
21 time.<sup>31</sup> Additionally, as pointed out in the study by Barnett et al.<sup>18</sup>, doctors in surgical  
22 specialities are significantly more likely to be rated poorly than non-surgical specialists or  
23 GPs when breaking bad news.  
24  
25  
26  
27  
28  
29  
30  
31  
32  
33  
34  
35  
36  
37  
38

39 For the participants in the present study palliative treatment implied hope that  
40 something could be done. Previous studies have also underlined how palliative treatments  
41 imply hope. Hope is an important coping strategy in such patients,<sup>32,33</sup> and has been  
42 described as essential in human life, and important for a person's quality of life and well-  
43 being.<sup>33</sup> Hope is the confident but uncertain expectation of a good future that appears to be  
44 realistically possible and is personally significant to the individual.<sup>34</sup> The realistic hope for  
45 most of our participants was that something could be done to relieve their symptoms and  
46 potentially to postpone death, and to enable ordinary everyday lives and the possibility of  
47  
48  
49  
50  
51  
52  
53  
54  
55

1  
2  
3 spending time with family and friends. Furthermore, the patients emphasized the importance  
4 of including hope in HCPs' communication of disease, prognosis and life expectancy  
5 throughout the disease trajectory. Previous studies show that there is a fine balance between  
6 telling the truth and nurturing hope,<sup>15 35</sup> and there is a spectrum of hope, from hope for a cure  
7 to hope for living as normally as possible,<sup>15 35</sup> which was also identified in our study.  
8  
9  
10  
11  
12

13 It was a diversity of how detailed information the participants wanted about their  
14 disease and likely future perspectives. Some wanted the information bit by bit, while other  
15 preferred a total overview. Previous studies indicate that patients with incurable cancer want  
16 truthful information about their disease, treatment, and likely future perspectives.<sup>36 37</sup>  
17 However, there are individual preferences, and individual customized approaches seem to be  
18 necessary.<sup>38 39</sup> The individual variety and preferences of our participants might be considered  
19 as an important part of their life-world, which should be attended to in communication  
20 between patients and physicians or nurses.<sup>19</sup> Additionally, coping orientation (problem-  
21 focused or emotion-focused),<sup>31</sup> along with previous experiences, personality traits and  
22 perhaps robustness, might have influenced how our participants experienced and preferred the  
23 information and communication. All the participants in the present study were aware of the  
24 incurable nature of their disease. However, we did not explore their accurate prognostic  
25 awareness, which was the main focus of the systematic review and meta-regression analysis  
26 by Chen et al.<sup>9</sup>  
27  
28  
29  
30  
31  
32  
33  
34  
35  
36  
37  
38  
39  
40  
41  
42  
43

44 An organization of palliative treatment and care with the same well-qualified  
45 physician or nurse each time they visited the cancer centre was emphasized as being  
46 important for the participants to be able to feel safe and to increase the possibility of  
47 individual and customized care, and to be able to open up their inner thoughts. The  
48 participants seemed to prefer physician or nurse communications to include what Mishler<sup>30</sup>  
49 has characterized as the “voice of medicine”, which mainly focuses on the symptoms and  
50  
51  
52  
53  
54  
55  
56  
57  
58  
59  
60

1  
2  
3 medical and technical problems or aspects of the disease, and they also wanted physicians and  
4  
5 nurses to initiate communication focusing on the participants' inner thoughts related to their  
6  
7 illness—what Mishler<sup>30</sup> calls the “voice of lifeworld”— including more open-ended  
8  
9 questions. Such physicians and nurses might be characterized as compassionate caregivers.<sup>40</sup>  
10

### 15 **Implications for health care**

16  
17 It might be considered to be overly demanding and tough to be the bearer of bad news of an  
18  
19 incurable disease. Some of our participants even pointed out that surgeons who are unable to  
20  
21 give the message in an appropriate way should not communicate with patients. Rogg et al.<sup>8</sup>  
22  
23 showed in their study that the Norwegian guidelines and training for physicians  
24  
25 communication of bleak prognosis were not sufficient. Further, they found that most  
26  
27 physicians reported that their education for such communication was achieved mainly through  
28  
29 observing colleagues and training.<sup>8</sup> This indicates that it is a need for increased focus on  
30  
31 communication both during university studies and in hospitals.  
32  
33

34  
35 Physicians and nurses have extensive responsibilities in how they communicate with  
36  
37 patients with incurable disease, particularly because of the asymmetrical relationship between  
38  
39 patients and HCPs. The HCPs have knowledge of how the disease will most likely progress,  
40  
41 and also common psychological responses. However, the patients' inner thoughts and life-  
42  
43 world are not necessarily known to the HCP. The responsibility to invite or initiate  
44  
45 communication on patients' inner thoughts and to start communication focusing on these  
46  
47 issues, is in the hands of physicians and nurses. Furthermore, it is important to strive for a  
48  
49 more symmetrical relationship between patients and HPCs,<sup>19 28</sup> which will also increase the  
50  
51 possibility of shared decision-making in treatment and care.  
52  
53  
54  
55



1  
2  
3 Throughout their disease trajectory, the participants in our study preferred  
4 individualized and customized information and communication. Physicians and nurses have to  
5 be aware of, and to focus on, this whenever they inform and communicate with patients about  
6 their disease and life expectancy. This requires not only communication skills but also enough  
7 knowledge of the medical and psychological issues related to the disease and how these might  
8 progress.  
9  
10  
11  
12  
13  
14

15 The participants preferred compassionate physicians and nurses. Being compassionate  
16 requires more than empathy; it requires knowledge, proactivity and interconnectedness.<sup>40</sup>  
17 Furthermore, to become a compassionate physician or nurse, training is required through  
18 observation, guidance and feedback on one's own practice.<sup>40</sup> HCPs also need to be aware of  
19 how much information each patient prefers, and this awareness is associated with years of  
20 practice and confidence.<sup>8</sup> In addition, the treatment and care of patients undergoing palliative  
21 chemotherapy should be organized in such a way that patients are able to see the same well-  
22 qualified physicians and optionally also the same nurses at each consultation or visit at the  
23 cancer centre.  
24  
25  
26  
27  
28  
29  
30  
31  
32  
33  
34  
35  
36  
37

### 38 **Methodological considerations**

39  
40 The strengths of the study are that the 20 participants provided us with rich data about their  
41 experiences, feelings and reflections upon HCPs' information and communication of disease  
42 and life expectancy during their disease trajectory. The authors are two nurses and a  
43 gynaecologist treating patients with cancer, all with clinical experience and knowledge in  
44 treating and caring for several patient groups within palliative care, which were used in the  
45 discussion of the findings. Qualitative content analysis aims to stay close to the data and texts  
46  
47  
48  
49  
50  
51  
52  
53  
54  
55

1  
2  
3 to reveal the findings; however, the researchers' pre-understanding might also have  
4  
5 influenced the analysis of the data.  
6

7 We studied patients with one type of cancer who were in the palliative phase, which  
8  
9 can be seen as a strength. Colorectal cancer is the second most common cancer diagnosed in  
10  
11 women worldwide, and the third most common cancer diagnosed in men<sup>21 22</sup>, and the  
12  
13 knowledge could be applied to the patient group. On the other hand, studying just one patient  
14  
15 group might also limit the variance in findings that more heterogeneous groups might have  
16  
17 brought. Although our findings might not be generalizable to patients with other cancer  
18  
19 diagnoses, the findings can be transferable to hospitals with similar organisation of surgery  
20  
21 and post-surgery palliative treatments.  
22  
23  
24  
25  
26  
27

## 28 **Conclusions**

29  
30 These findings provide a deeper knowledge of how patients with incurable colorectal cancer  
31  
32 in the palliative phase experience and reflect upon HCP–patient communications on disease  
33  
34 and life expectancy from before the surgery through to post-surgery chemotherapy. While the  
35  
36 first receipt of information of having an incurable disease was experienced as insufficient,  
37  
38 post-surgery palliative chemotherapy offered some hope. The participants preferred  
39  
40 individualized information about the treatment and likely future perspectives, and HCPs with  
41  
42 a holistic approach, including an ability to focus on their life-world with compassion.  
43  
44  
45  
46  
47  
48  
49  
50  
51  
52  
53  
54  
55

**Authors 'contributions**

GR and IV were responsible for the study design

GR was responsible for the patient interviews and data collection

GR, US and IV contributed to a critical appraisal of the analyses, manuscript preparation and have read and approved the final version of the manuscript.

**Competing interests:** The authors declare that they have no competing interests.

**Acknowledgement:** We thank the Department of Clinical Research at Sorlandet Hospital and the Faculty of Health and Sport Science, University of Agder for funding the study.

Gudrun Rohde was a visiting researcher, as an Affiliate Academic, in the Marie Curie Palliative Care Research Department, University College London, January-June 2017 while writing most of the paper. We wish to thank the three patients who helped us in designing the study. We also want to thank all the patients who participated.

**Funding:** No further funding to disclose

**Data sharing statement:** All data are published, and therefore there is no additional data available. Owing to the sensitive nature of the information and appropriate medical ethics, access to the raw data set will be reviewed on request.

## References

1. McRee AJ, Goldberg RM. Optimal management of metastatic colorectal cancer: current status. *Drugs* 2011;71(7):869-84.
2. Cameron J, Waterworth S. Patients' experiences of ongoing palliative chemotherapy for metastatic colorectal cancer: a qualitative study. *International journal of palliative nursing* 2014;20(5):218-24. [published Online First: 2014/05/24]
3. Cameron MG, Kersten C, Guren MG, et al. Palliative pelvic radiotherapy of symptomatic incurable prostate cancer - a systematic review. *Radiother Oncol* 2014;110(1):55-60. doi: 10.1016/j.radonc.2013.08.008 [published Online First: 2013/09/21]
4. Cameron MG, Kersten C, Vistad I, et al. Palliative pelvic radiotherapy for symptomatic rectal cancer - a prospective multicenter study. *Acta Oncol* 2016;55(12):1400-07. doi: 10.1080/0284186x.2016.1191666 [published Online First: 2016/06/23]
5. Hancock K, Clayton JM, Parker SM, et al. Truth-telling in discussing prognosis in advanced life-limiting illnesses: a systematic review. *Palliat Med* 2007;21(6):507-17. doi: 10.1177/0269216307080823 [published Online First: 2007/09/12]
6. Hagerty RG, Butow PN, Ellis PM, et al. Communicating prognosis in cancer care: a systematic review of the literature. *Ann Oncol* 2005;16(7):1005-53. doi: 10.1093/annonc/mdi211 [published Online First: 2005/06/09]
7. Chou WS, Hamel LM, Thai CL, et al. Discussing prognosis and treatment goals with patients with advanced cancer: A qualitative analysis of oncologists' language. *Health expectations : an international journal of public participation in health care and health policy* 2017;20(5):1073-80. doi: 10.1111/hex.12549 [published Online First: 2017/03/07]
8. Rogg L, Aasland OG, Graugaard PK, et al. Direct communication, the unquestionable ideal? Oncologists' accounts of communication of bleak prognoses. *Psychooncology* 2010;19(11):1221-28.
9. Chen CH, Kuo SC, Tang ST. Current status of accurate prognostic awareness in advanced/terminally ill cancer patients: Systematic review and meta-regression analysis. *Palliat Med* 2017;31(5):406-18. doi: 10.1177/0269216316663976 [published Online First: 2016/08/06]
10. Martinsson L, Axelsson B, Melin-Johansson C. Patients' perception of information from physicians during palliative chemotherapy: a qualitative study. *Psychooncology* 2016;14(5):495-502. doi: 10.1017/S1478951515001200

11. Murray CD, McDonald C, Atkin H. The communication experiences of patients with palliative care needs: A systematic review and meta-synthesis of qualitative findings. *Palliative & supportive care* 2015;13(2):369-83. doi: 10.1017/s1478951514000455 [published Online First: 2014/05/03]
12. Kirk P, Kirk I, Kristjanson LJ. What do patients receiving palliative care for cancer and their families want to be told? A Canadian and Australian qualitative study. *BMJ* 2004;328(7452):1343. doi: 10.1136/bmj.38103.423576.55 [published Online First: 2004/05/21]
13. Butow PN, Dowsett S, Hagerty R, et al. Communicating prognosis to patients with metastatic disease: what do they really want to know? *Support Care Cancer* 2002;10(2):161-8. doi: 10.1007/s005200100290 [published Online First: 2002/02/28]
14. Clarke MG, Kennedy KP, MacDonagh RP. Discussing life expectancy with surgical patients: do patients want to know and how should this information be delivered? *BMC medical informatics and decision making* 2008;8:24. doi: 10.1186/1472-6947-8-24 [published Online First: 2008/06/17]
15. Clayton JM, Butow PN, Arnold RM, et al. Fostering coping and nurturing hope when discussing the future with terminally ill cancer patients and their caregivers. *Cancer* 2005;103(9):1965-75. doi: 10.1002/cncr.21011 [published Online First: 2005/03/25]
16. Stajduhar KI, Thorne SE, McGuinness L, et al. Patient perceptions of helpful communication in the context of advanced cancer. *J Clin Nurs* 2010;19(13-14):2039-47. doi: 10.1111/j.1365-2702.2009.03158.x [published Online First: 2010/10/06]
17. Richardson J. Health promotion in palliative care: the patients' perception of therapeutic interaction with the palliative nurse in the primary care setting. *J Adv Nurs* 2002;40(4):432-40. [published Online First: 2002/11/08]
18. Barnett MM. Effect of breaking bad news on patients' perceptions of doctors. *Journal of the Royal Society of Medicine* 2002;95(7):343-7. [published Online First: 2002/07/02]
19. Løgstrup KE. The ethical demand. Notre Dame, Ill: University of Notre Dame Press 1997.
20. Mishler EG. The Discourse of Medicine - Dialectics of Medical Interviews 1984.
21. Jemal A, Center MM, DeSantis C, et al. Global patterns of cancer incidence and mortality rates and trends. *Cancer Epidemiol Biomarkers Prev* 2010;19(8):1893-907. doi: 10.1158/1055-9965.epi-10-0437 [published Online First: 2010/07/22]
22. Torre LA, Bray F, Siegel RL, et al. Global cancer statistics, 2012. *CA Cancer J Clin* 2015;65(2):87-108. doi: 10.3322/caac.21262 [published Online First: 2015/02/06]
23. Crabtree BF, Miller WL. Doing qualitative research. Thousand Oaks, Calif.: Sage 1999.
24. Rohde G, Kersten C, Vistad I, et al. Spiritual Well-being in Patients With Metastatic Colorectal Cancer Receiving Noncurative Chemotherapy: A Qualitative Study. *Cancer Nurs* 2016 doi: 10.1097/ncc.0000000000000385 [published Online First: 2016/04/22]
25. Polit DF. Essentials of nursing research: methods, appraisal, and utilization. Philadelphia: Lippincott Williams & Wilkins 2006.
26. Beauchamp TL, Childress JF. Principles of biomedical ethics. 7th ed. ed. New York: Oxford University Press 2013.
27. WMA Declaration of Helsinki. Ethical Principles for Medical Research Involving Human Subjects 2013 [Available from: <http://www.wma.net/en/30publications/10policies/b3/>].
28. Rogg L, Loge JH, Aasland OG, et al. Physicians' attitudes towards disclosure of prognostic information: a survey among a representative cross-section of 1605 Norwegian physicians. *Patient Educ Couns* 2009;77(2):242-7. doi: 10.1016/j.pec.2009.03.007 [published Online First: 2009/04/10]

- 1  
2  
3 29. Friedrichsen MJ, Strang PM, Carlsson ME. Breaking bad news in the transition from  
4 curative to palliative cancer care--patient's view of the doctor giving the information.  
5 *Support Care Cancer* 2000;8(6):472-8. [published Online First: 2000/11/30]  
6 30. G ME. *The Discourse of Medicine - Dialectics of Medical Interviews*. New Jersey: Ablex  
7 Publishing Corporation, Norwood, New Jersey 1984.  
8 31. Lazarus RS, Folkman S. *Stress, appraisal, and coping*. New York: Springer 1984.  
9 32. Hegarty M. The Dynamic of Hope: Hoping in the Face of Death. *Progress in Palliative*  
10 *Care* 2001;9(2):42-46. doi: 10.1080/09699260.2001.11746903  
11 33. Rustoen T. Hope and quality of life, two central issues for cancer patients: a theoretical  
12 analysis. *Cancer Nurs* 1995;18(5):355-61. [published Online First: 1995/10/01]  
13 34. Dufault K, Martocchio BC. Symposium on compassionate care and the dying experience.  
14 Hope: its spheres and dimensions. *Nurs Clin North Am* 1985;20(2):379-91. [published  
15 Online First: 1985/06/01]  
16 35. Clayton JM, Butow PN, Arnold RM, et al. Discussing life expectancy with terminally ill  
17 cancer patients and their carers: a qualitative study. *Support Care Cancer*  
18 2005;13(9):733-42. doi: 10.1007/s00520-005-0789-4 [published Online First:  
19 2005/03/12]  
20 36. Miccinesi G, Bianchi E, Brunelli C, et al. End-of-life preferences in advanced cancer  
21 patients willing to discuss issues surrounding their terminal condition. *Eur J Cancer*  
22 *Care (Engl)* 2012;21(5):623-33. doi: 10.1111/j.1365-2354.2012.01347.x [published  
23 Online First: 2012/04/24]  
24 37. Hagerty RG, Butow PN, Ellis PA, et al. Cancer patient preferences for communication of  
25 prognosis in the metastatic setting. *J Clin Oncol* 2004;22(9):1721-30. doi:  
26 10.1200/jco.2004.04.095 [published Online First: 2004/05/01]  
27 38. Mackenzie LJ, Carey ML, Paul CL, et al. Do we get it right? Radiation oncology  
28 outpatients' perceptions of the patient centredness of life expectancy disclosure.  
29 *Psychooncology* 2013;22(12):2720-8. doi: 10.1002/pon.3337 [published Online First:  
30 2013/06/27]  
31 39. Walczak A, Butow PN, Davidson PM, et al. Patient perspectives regarding  
32 communication about prognosis and end-of-life issues: how can it be optimised?  
33 *Patient Educ Couns* 2013;90(3):307-14. doi: 10.1016/j.pec.2011.08.009 [published  
34 Online First: 2011/09/17]  
35 40. Larkin PJ. *Compassion - The Essence of Palliative and End-of-life Care*. First ed. New  
36 York: Oxford University Press 2016.  
37  
38  
39  
40  
41  
42  
43  
44  
45  
46  
47  
48  
49  
50  
51  
52  
53  
54  
55  
56  
57  
58  
59  
60

**Table 1:** Characteristics of patients receiving non-curative chemotherapy.

|                                                  | First-line ( <i>n</i> = 12) | Second-line ( <i>n</i> = 8) |
|--------------------------------------------------|-----------------------------|-----------------------------|
| Women                                            | 5                           | 3                           |
| Men                                              | 7                           | 5                           |
| Mean age (range), years                          | 63 (34–75)                  | 69 (64–75)                  |
| Marital status:                                  |                             |                             |
| Married/cohabiting                               | 10                          | 8                           |
| Single                                           | 1                           |                             |
| Widow/widower                                    | 1                           |                             |
| Chemotherapy used:                               |                             |                             |
| Fliri/bevacizumab                                | 10                          |                             |
| Flox (5-fluorouracil, folinic acid, axaliplatin) | 1                           | 8                           |
| Capecitabine plus oxaliplatin (Xelox)            | 1                           |                             |

All patients received 5-fluorouracil-based combination chemotherapy with irinotecan or oxaliplatin, +/- bevacizumab.

**Table 1**

Consolidated criteria for reporting qualitative studies (COREQ): 32-item checklist

| No                                             | Item                                     | Guide questions/description                                                           |
|------------------------------------------------|------------------------------------------|---------------------------------------------------------------------------------------|
| <b>Domain 1: Research team and reflexivity</b> |                                          |                                                                                       |
| Personal Characteristics                       |                                          |                                                                                       |
| 1.                                             | Interviewer/facilitator                  | G Rohde (All interviews), p 7                                                         |
| 2.                                             | Credentials                              | PhD and professors, p 1                                                               |
| 3.                                             | Occupation                               | Professors, p 1                                                                       |
| 4.                                             | Gender                                   | All female, p 7                                                                       |
| 5.                                             | Experience and training                  | All were trained researchers, p 7                                                     |
| Relationship with participants                 |                                          |                                                                                       |
| 6.                                             | Relationship established                 | No relationship before the interviews, p 7                                            |
| 7.                                             | Participant knowledge of the interviewer | The participants did not know the interviewer, p 7                                    |
| 8.                                             | Interviewer characteristics              | Nurse and professor and had interests for the topic, p 7                              |
| <b>Domain 2: study design</b>                  |                                          |                                                                                       |
| Theoretical framework                          |                                          |                                                                                       |
| 9.                                             | Methodological orientation and Theory    | Content analysis, p7                                                                  |
| Participant selection                          |                                          |                                                                                       |
| 10.                                            | Sampling                                 | The patients physicians asked if the researcher could contact them for inclusion, p 6 |
| 11.                                            | Method of approach                       | Face-to-face, p 7                                                                     |
| 12.                                            | Sample size                              | Twenty patients (Twelve men and eight women), p 6                                     |



| No                                      | Item                           | Guide questions/description                                                                  |
|-----------------------------------------|--------------------------------|----------------------------------------------------------------------------------------------|
| 13.                                     | Non-participation              | We have limited information about this, p 6                                                  |
| Setting                                 |                                |                                                                                              |
| 14.                                     | Setting of data collection     | Out-patient clinic and patients home (one patient), p 7                                      |
| 15.                                     | Presence of non-participants   | Non, p 6                                                                                     |
| 16.                                     | Description of sample          | Patients with metastatic colorectal cancer receiving non-curative chemotherapy, p 6          |
| Data collection                         |                                |                                                                                              |
| 17.                                     | Interview guide                | The interview guide was made by the researchers, p 7 and 8                                   |
| 18.                                     | Repeat interviews              | No repeated interviews were performed, p 7                                                   |
| 19.                                     | Audio/visual recording         | Audio recording was used to collect the data, p 7                                            |
| 20.                                     | Field notes                    | Field notes were made after the interviews, not stated in the manuscript                     |
| 21.                                     | Duration                       | 50-100 minutes, p 7                                                                          |
| 22.                                     | Data saturation                | Data saturation was discussed and reached, p 7                                               |
| 23.                                     | Transcripts returned           | The transcripts were not returned to participants for comments, not stated in the manuscript |
| <b>Domain 3: analysis and findingsz</b> |                                |                                                                                              |
| Data analysis                           |                                |                                                                                              |
| 24.                                     | Number of data coders          | one, p 8                                                                                     |
| 25.                                     | Description of the coding tree | The authors provided a description of the coding, p 8                                        |
| 26.                                     | Derivation of themes           | The themes were derived from the data, p 8                                                   |

| No        | Item                         | Guide questions/description                                                              |
|-----------|------------------------------|------------------------------------------------------------------------------------------|
| 27.       | Software                     | none                                                                                     |
| 28.       | Participant checking         | The participants did not provide feedback on the findings, not written in the manuscript |
| Reporting |                              |                                                                                          |
| 29.       | Quotations presented         | The quotations presented illustrate the themes / findings, p 9 - 14                      |
| 30.       | Data and findings consistent | There was consistency between the data presented and the findings p 8 - 14               |
| 31.       | Clarity of major themes      | Major themes were clearly presented in the findings, p 8                                 |
| 32.       | Clarity of minor themes      | No                                                                                       |

# BMJ Open

## Communication of disease prognosis and life expectancy in patients with colorectal cancer undergoing palliative care: a qualitative study

|                                 |                                                                                                                                                                                                                                                                                                                                                                                      |
|---------------------------------|--------------------------------------------------------------------------------------------------------------------------------------------------------------------------------------------------------------------------------------------------------------------------------------------------------------------------------------------------------------------------------------|
| Journal:                        | <i>BMJ Open</i>                                                                                                                                                                                                                                                                                                                                                                      |
| Manuscript ID                   | bmjopen-2018-023463.R2                                                                                                                                                                                                                                                                                                                                                               |
| Article Type:                   | Research                                                                                                                                                                                                                                                                                                                                                                             |
| Date Submitted by the Author:   | 08-Oct-2018                                                                                                                                                                                                                                                                                                                                                                          |
| Complete List of Authors:       | Rohde, Gudrun; University of Agder, Faculty of Health and Sport Sciences; Sorlandet Hospital , Department of Clinical Research Söderhamn, Ulrika; University of Agder, Centre for Caring Research – Southern Norway, Department of Health and nursing Sciences, Faculty of Health and Sport Sciences<br>Vistad, Ingvild ; Sorlandet Hospital Kristiansand , Obstetric and gynecology |
| <b>Primary Subject Heading</b>: | Palliative care                                                                                                                                                                                                                                                                                                                                                                      |
| Secondary Subject Heading:      | Communication                                                                                                                                                                                                                                                                                                                                                                        |
| Keywords:                       | palliative care information, vulnerability, life-world, compassion                                                                                                                                                                                                                                                                                                                   |
|                                 |                                                                                                                                                                                                                                                                                                                                                                                      |

SCHOLARONE™  
Manuscripts

1  
2  
3  
4 **Communication of disease prognosis and life expectancy in patients with colorectal**  
5 **cancer undergoing palliative care: a qualitative study**  
6  
7  
8  
9

10 **Authors:**

11  
12 Gudrun Rohde, PhD (Corresponding author)

13  
14 Professor, University of Agder, Faculty of Health and Sport Sciences and Department of

15  
16 Clinical Research, Sorlandet Hospital Kristiansand

17  
18 Postbox 422, 4604 Kristiansand, Norway

19  
20 Phone: +47 99164094

21  
22 Email: ([gudrun.e.rohde@uia.no](mailto:gudrun.e.rohde@uia.no))  
23  
24  
25  
26  
27

28 Ulrika Söderhamn, PhD

29  
30 Professor

31  
32 University of Agder, Faculty of Health and Sport Sciences

33  
34 Postbox 509

35  
36 4898 Grimstad, Norway

37  
38 Phone: +47 416 98 753

39  
40  
41 Email: [Ulrika.soderhamn@uia.no](mailto:Ulrika.soderhamn@uia.no)  
42  
43  
44  
45

46 Ingvild Vistad, MD PhD

47  
48 Department of Obstetrics and Gynecology, Sorlandet Hospital HF, Kristiansand

49  
50 Gynaecologist and Professor

51  
52 Postbox 416, 4604 Kristiansand, Norway

53  
54 Phone: +47 97532316  
55

1  
2  
3 Email: [Ingvild.vistad@sshf.no](mailto:Ingvild.vistad@sshf.no)  
4  
5  
6  
7  
8  
9  
10  
11  
12  
13  
14  
15  
16  
17  
18  
19  
20  
21  
22  
23  
24  
25  
26  
27  
28  
29  
30  
31  
32  
33  
34  
35  
36  
37  
38  
39  
40  
41  
42  
43  
44  
45  
46  
47  
48  
49  
50  
51  
52  
53  
54  
55  
56  
57  
58  
59  
60

For peer review only

**Abstract:**

**Objectives** Patients with colorectal cancer undergoing palliative treatment receive extensive amounts of treatment-related information throughout their disease trajectory. We aimed to explore the experiences of patients with incurable colorectal cancer and their reflections upon information given by physicians and nurses while in palliative care. Our main focus was the patients' thoughts about how disease information and life expectancy were communicated, from the first time that they were informed about the incurable nature of their disease through to post-surgery palliative treatment.

**Settings** Patients with colorectal cancer receiving palliative chemotherapy.

**Research design** We used a qualitative approach, and the data were analysed according to qualitative content analysis.

**Participants** Twenty patients (34–75 years of age) were included in the study: 12 received first-line chemotherapy, and eight received second-line chemotherapy. Eleven patients were treated by oncologists, and nine were treated by junior physicians.

**Results** Through data-driven empirical analysis, we identified four themes: (1) insufficient initial information, (2) palliative chemotherapy and compassionate physicians and nurses offered hope, (3) the information given should be truthful and complete and (4) professional, personal and organizational factors influenced information and communication.

**Conclusion** Receiving the first information of having an incurable disease was experienced as insufficient, while post-surgery palliative chemotherapy offered hope. The patients preferred customized information about treatment and likely future perspectives, and physicians and nurses with a holistic approach focusing on their life-world with compassion. To be a sensitive, holistic, and compassionate physician or nurse requires knowledge and confidence. To achieve this, training and guidance at universities and in hospitals are needed.

### Strengths and limitations of the study

- In dept and rich knowledge from 20 palliative colorectal cancer patients' thoughts about how disease information, prognoses and life expectancy were communicated, from the first time that they were informed about the incurable nature of the disease *through* to post-surgery treatment.
- The qualitative design gives insight into how palliative colorectal patients prefer health care professionals being compassionate throughout the entire disease trajectory.
- It can be seen as a limitation to focus on one group of patients in palliative care, because it can limit the variance in findings that more heterogeneous groups might have brought.
- We interviewed the patients during chemotherapy at one time point only and their memory about first information may have been coloured by later experiences.

**Key words:** palliative care information; vulnerability; life-world, compassion

**Words:** 4401 (revised 4170)

## Background

Patients with cancer treated with palliative intent receive extensive amounts of disease-related information from the first time they are informed about the incurable nature of their disease, through the following months or even years with treatment and care.<sup>1-4</sup> Guidelines encourage health care professionals (HCPs) such as physicians and nurses to inform and discuss prognoses and likely future perspectives with the patients. However, many HCPs and patients struggle with the right approach for these discussions.<sup>5-7</sup> On the other hand, primarily focusing on open communication regarding the bleak prospects of life expectancy entails a risk of overrunning the individual's information needs and hopes.<sup>8</sup> In-depth studies on patients' experiences about information given by physicians throughout the disease trajectory are needed in order to guide HCP how to communicate palliative patients' diagnosis and life-expectancy.

Most studies focusing on patient–HCP communication of disease and prognosis in patients with incurable cancer are quantitative involving patients in an early stage of the disease.<sup>6</sup> Qualitative studies show diverging results regarding the patient's acceptance of the chronic and incurable nature of their disease, and the presentation of their prognosis.<sup>9-15</sup> Patients request both disease and illness oriented information by caring and trusting HCPs.<sup>11</sup>

Patients with cancer in a palliative phase of treatment are vulnerable, and good patient–HCP relationships are important.<sup>16</sup> The philosopher Løgstrup<sup>17</sup> emphasized the importance of trust and the patients' vulnerability in such relationships. Furthermore, Mishler<sup>18</sup> distinguished between the voice of medicine (the technical–scientific assumptions of medicine) and the voice of the life-world (the natural attitudes of everyday life), in patient–physician communication. He suggested an increased attentiveness to the voice of the patients in terms of their life-world, especially in vulnerable patients like patients in palliative care.



1  
2  
3 Patients with incurable cancer often experience a life crisis when they are informed  
4 about the incurable nature of their cancer.<sup>19</sup> Over time, the majority adjust to their new life  
5 situation, and during this time, preferences and experiences regarding information and  
6 communication might change.<sup>16</sup> Colorectal cancer patients represent one of the most common  
7 cancer types<sup>19 20</sup> and there is limited knowledge of how this patient group look upon  
8 information and communication of disease and life expectancy *throughout* the disease  
9 trajectory as most studies include heterogeneous groups of patients. Therefore, we aimed to  
10 explore the experiences of patients with incurable colorectal cancer and their reflections upon  
11 information given by physicians and nurses while in palliative care. Our main focus was the  
12 patients' thoughts about how disease information, prognoses and life expectancy were  
13 communicated, from the first time that they were informed about the incurable nature of the  
14 disease through to post-surgery palliative treatment.

## 31 **Methods**

32  
33 We chose a qualitative inductive approach using in-depth interviews.<sup>21</sup> As a part of a larger  
34 study<sup>22</sup> we invited patients with metastatic colorectal cancer who were referred for palliative  
35 chemotherapy at three regional hospitals in Southern Norway. Oncologists informed patients  
36 at the outpatient clinics about the study when they attended for the second or third cycle of  
37 chemotherapy. Surgery is performed at the surgery department, with surgeons being  
38 responsible for the patients in this phase. Chemotherapy is provided at an oncological  
39 outpatient clinic with oncologists being responsible for the treatment.

40  
41 The patients were eligible for inclusion if they were aged 18 years or older, had  
42 metastatic colorectal cancer, were undergoing surgery for their cancer, had been referred for  
43 first- or second-line palliative chemotherapy, had a life expectancy of >6 months and were

1  
2  
3 able to give written informed consent. We included patients of different ages, marital statuses  
4 and other demographic and clinical characteristics.<sup>23</sup> We excluded patients with any  
5  
6 significant comorbidity that could compromise life expectancy, or inability to understand or  
7  
8 read Norwegian. Patients with conditions that the physician believed could affect the patient's  
9  
10 ability to understand or cope with the questions were not considered to be eligible, including  
11  
12 patients who were considered to be too emotionally vulnerable ( $n = 4$ ). The patients were  
13  
14 included consecutively.  
15  
16

17  
18 Twenty patients with colorectal cancer (34–75 years of age) were invited to participate  
19  
20 in the study over a period of 1 year, and all of them accepted the invitation. All patients  
21  
22 received combination chemotherapy (see Table 1) and had few physical symptoms related to  
23  
24 their disease. The sample comprised 12 patients receiving first-line chemotherapy (five  
25  
26 women and seven men) and eight receiving second-line chemotherapy (three women and five  
27  
28 men). Eleven patients were treated by oncologists, and nine were treated by junior physicians.  
29  
30

31  
32 <Table 1 about here>  
33  
34

### 35 **Data collection**

36  
37 The same researcher (GR) conducted all the interviews. At 2–4 days after the interview, GR  
38  
39 contacted the patient and asked whether the interview had influenced him or her negatively.  
40  
41 No patients experienced a negative influence or reaction. We performed in-depth interviews  
42  
43 lasting 50–100 minutes using a semi-structured interview guide to ensure that we included the  
44  
45 issues in focus<sup>21</sup> and asked questions such as the following. “What do you think about the  
46  
47 first information that you received about your disease and the prognosis?” “How was the  
48  
49 information provided about the follow-up chemotherapy and likely future perspectives?”  
50  
51 “Have you received the information as you expected or is there anything missing?” “What are  
52  
53 important when giving disease information and prognosis, and how do you want it to be  
54  
55

1  
2  
3 given/delivered?” After the 11<sup>th</sup> interview, we did some preliminary analyses and made minor  
4  
5 changes to the interview guide to obtain more data on issues that needed to be expanded to  
6  
7 answer the research aim; for example, “What characterized the good information that you  
8  
9 received versus other information that you were not happy with?” Patients were included until  
10  
11 data saturation was achieved, indicated by minor new information in interview 19 and 20.<sup>21</sup>  
12  
13 One interview took place at the patient’s home. The other interviews took place at the cancer  
14  
15 centre or outpatient clinics, at a time when the patients had an appointment. The researchers  
16  
17 did not know the patients before the interviews and did not treat the patients.  
18  
19  
20

## 21 **Analysis**

22  
23 We audiotaped and transcribed the interviews verbatim and made logs after each interview.  
24  
25 The data were analysed according to qualitative content analysis to identify the themes in the  
26  
27 data. In the discussion, we interpreted our findings in light of the researchers’ previous  
28  
29 understanding and theory. GR and US are both nurses and professors in health sciences with  
30  
31 clinical experience in palliative care. IV is a gynaecologist and professor, also with extensive  
32  
33 experience in treating patients with cancer undergoing palliative care.  
34  
35

36  
37 In the analyses, we (i) read all the interviews to understand the meaning of the whole  
38  
39 text, (ii) investigated sentences or sections to expose their meaning and to facilitate the  
40  
41 identification of themes, (iii) related sentences or sections to the meaning of the whole text  
42  
43 and (iv) identified passages representative of shared understandings between the researchers  
44  
45 and participants. To support the analysis, we created mind maps and discussed the analysis  
46  
47 among the authors. The analysis steps were followed carefully, which increases the reliability  
48  
49 of the study. Quotations have been used to illustrate and support the findings, and by that  
50  
51 increasing the trustworthiness. To validate the findings, all authors participated in discussions  
52  
53 of the empirical analysis and in writing up the findings.  
54  
55

## Ethics

Voluntariness and confidentiality were assured during the collection, handling and reporting of data.<sup>24,25</sup> The study was approved by the Regional Committee for Medical Research Ethics (REK South-East 2011/2464).

## Patient involvement

Before we started the study, we performed three pilot-interviews with cancer patients to test the study design and interview-guide, and we made minor changes to the guide. These interviews are not included in the study. No further patients' involvement was undertaken when it comes to the specific aims or interpretation of the findings. The dissemination of the findings will be this publication.

## Findings

Through data-driven empirical analysis, we identified four themes: (1) insufficient initial information, (2) palliative chemotherapy and compassionate physicians and nurses offered hope, (3) the information given should be truthful and complete and (4) professional, personal and organizational factors influenced information and communication. We did not identify any differences between participants receiving first- or second-line chemotherapy.

### Insufficient initial information

The participants experienced receiving information about the incurable nature of their cancer differently, and the information was given in different settings. Some had to wait a long time (weeks or months) from their first worries about the disease until they were examined or had an appointment at the hospital. When the cancer was finally diagnosed, they received limited apologies from the physicians because of the delay and emphasized that an apology would

1  
2  
3 have made the situation easier to handle. Some had not even felt particularly ill, and it was  
4  
5 hard for them to understand the message about having an incurable disease when the  
6  
7 physician informed them. Most participants were informed about their diagnosis by surgeons,  
8  
9 except for two who were informed by their general practitioners (GPs). Several participants  
10  
11 experienced the first information about the incurable nature of their disease as a shock.  
12

13  
14 *“When the surgeon gave me the message that my disease was incurable, I was shocked, I*  
15  
16 *didn’t feel that anything was wrong. I asked him how long I had left to live. He just shrugged*  
17  
18 *and didn’t have any answer. The conversation took 8 minutes” (patient 4, woman aged 54*  
19  
20 *years).*  
21

22  
23  
24 Some participants reported that surgeons or GPs had given the message in an  
25  
26 inappropriate way, at an inappropriate place (e.g., in a small examination room). Further  
27  
28 questions from the participants were answered only to a limited extent, if at all. It was tough  
29  
30 to be told that their cancer could not be cured. The message was experienced as a death  
31  
32 sentence, and several participants felt left behind with unanswered questions.  
33

34  
35  
36  
37 *“It is important to tell the truth, but in an appropriate way. Go home and die. That is not*  
38  
39 *appropriate” (patient 4, woman aged 54 years).*  
40

41  
42  
43 Although the message was brutal to hear, some participants admitted that a straightforward  
44  
45 message was probably the best way.  
46

47  
48 Some participants experienced that the information before and after the operation was  
49  
50 insufficient. They would have liked more answers and adequate communication with the  
51  
52 surgeon. A couple of participants received a message that complete tumour resection was  
53  
54 impossible or that nearly nothing could be done. On the other hand, some of the male  
55

1  
2  
3 participants in particular, expressed satisfaction with how the surgeon had given pre- and  
4  
5 postoperative information and explained the operation, the consequences and likely future  
6  
7 treatment-related effects; e.g., challenges with the stoma or the risk of impotence after the  
8  
9 operation.

10  
11 *“I was happy with the information the surgeon gave. I am a person who ask questions, and I*  
12  
13 *am not afraid of asking. I received the answers I needed”*. (patient 15, man aged 73 years)

### 14 15 16 17 18 **Palliative chemotherapy and compassionate physicians and nurses offered hope**

19  
20  
21 When the participants started their post-surgery chemotherapy at the cancer centre further  
22  
23 treatment implied hope that something could be done. At the cancer centre the participants  
24  
25 were met with openness, knowledge and enough time. Nurses and physicians gave hope, and  
26  
27 the palliative treatment itself was also perceived as giving hope.

28  
29  
30  
31  
32 *“When I received the appointment for palliative chemotherapy I was relieved, something*  
33  
34 *could be done”* (patient 3, woman aged 74 years).

35  
36  
37  
38  
39 Furthermore, the participants emphasized the importance of including hope in patient  
40  
41 communication.

42  
43  
44  
45 *“She looks at you. She gives hope. That is how I want to be met”* (Patient 4, woman aged 54  
46  
47 years).

48  
49  
50  
51 The participants’ hope seemed to change from before they were diagnosed with their  
52  
53 incurable disease and through their disease trajectory. Even though they recognized that their

1  
2  
3 cancer was incurable, most participants hoped that they would be among those who could live  
4 for years despite poor a prognosis. As the disease progressed, they hoped for good days, not  
5 extraordinary things, or experiences. They just wanted ordinary everyday lives and the  
6 possibility of being together with family and friends. The participants wanted to continue to  
7 live and to see how things turned out.  
8  
9  
10  
11  
12

13  
14 *“I look forward to spring when the wagtail comes back outside my house” (patient 1, man*  
15 *aged 67 years).*  
16  
17  
18  
19  
20  
21

### 22 **The information given should be truthful and complete**

23  
24 Correct and truthful information about their disease, treatment effects, side-effects,  
25 metastases, and likely future perspectives was important for the participants. They preferred  
26 to receive the test results immediately rather than to wait until their next appointment at the  
27 cancer centre.  
28  
29  
30  
31  
32  
33  
34

35 *«There were minor changes after the last computer tomography. The oncologist telephoned*  
36 *and told the results. I didn't have to wait for the next appointment, I didn't have to worry until*  
37 *then» (patient 17, woman aged 71 years).*  
38  
39  
40  
41  
42  
43

44 Preferences regarding the amount of information that the participants wanted to  
45 receive at the time varied. Some participants wanted a total overview of their disease and  
46 prognosis from the start, some wanted a smaller amount of information at the time, while  
47 others wanted their body to tell them how their disease progressed.  
48  
49  
50  
51  
52  
53  
54  
55

1  
2  
3 *«I don't want to know the exact date. I would like information about disease progress and*  
4 *prognosis bit by bit, or let my body tell me bit by bit» (patient 17, woman aged 71 years).*  
5  
6  
7

8  
9 Most participants found vague information confusing. In particular, some of the male  
10 participants wanted straightforward information.  
11  
12

13  
14 *“I would like to know even more if it is possible. I don't want them to keep any information*  
15 *back. I would like to have a better overview and know what to expect in the future.” (patient*  
16 *13, man aged 68 years).*  
17  
18  
19

20  
21  
22 Most participants felt that they had received honest information and answers and had  
23 opportunities to ask questions. Some felt insecure if they were treated by a junior physician  
24 who could not answer all their questions.  
25  
26  
27

28  
29 *“I would have felt safer if I was treated by a specialist, one who didn't have to ask colleagues*  
30 *to be sure. At least occasionally” (patient 11, man aged 60 years).*  
31  
32  
33

34 The participants experienced receiving information about their life expectancy at the cancer  
35 centre differently. Some found the information to be sufficient and adequate, while other  
36 claimed that they had received unspecific information on this point topic, if anything at all.  
37  
38  
39  
40

41  
42  
43 *“They haven't said much about life expectancy. However, the treatment is palliative. They*  
44 *haven't given me the time. And I haven't asked» (patient 7, man aged 63 years).*  
45  
46  
47

48  
49 Some participants would have liked to know the exact prognosis and time, partly because they  
50 wanted to be able to “talk the serious talk” with their closest relatives and to be prepared to  
51 die. This was especially important to participants with children or vulnerable relatives. A  
52  
53  
54  
55



1  
2  
3 couple of the participants expressed gratitude that the oncologists had told them their true  
4  
5 prognosis even though they did not ask for it.  
6  
7

8  
9 **Professional, personal, and organizational factors influenced information and**  
10  
11 **communication**  
12

13 Most participants wanted their health care and treatment to be organized in such a way that it  
14  
15 was possible to see the same physician at each consultation. Some of those who had to  
16  
17 alternate between different physicians felt that they had to start from the beginning each time  
18  
19 and felt it to be exhausting.  
20  
21

22  
23 *“I am an introverted person. I am not able to speak openly with everyone. When I meet a new*  
24  
25 *physician, I have to start from the beginning, and I don’t like it. And it is OK to feel like this.*  
26  
27 *We are all different” (patient 2, woman aged 73 years).*  
28  
29

30 In addition to the discomfiting feeling of having to deal with new physicians, some  
31  
32 participants reported that messages had not been forwarded between the different physicians,  
33  
34 resulting in misunderstandings. They felt that no one was in charge of their medical care and  
35  
36 felt insecure; for example, when experiencing changes in treatment when they changed  
37  
38 physicians/junior doctors. Further, some participants underlined that a lack of coordination in  
39  
40 treatment and care implied extra burden, and emphasized that better organization, and nurses’  
41  
42 and physicians’ professional knowledge and ability to answer questions inspired confidence.  
43  
44

45 A combination of professional knowledge and personality was emphasized as  
46  
47 important. Furthermore, the participants highly appreciated physicians and nurses with  
48  
49 enough time, who knew them and their disease. One participant characterized this as follows:  
50  
51

52  
53 *“She is an oncologist with a heart and a brain” (patient 4, woman 54 years).*  
54  
55

1  
2  
3 The participants appreciated the possibility of contacting the physicians and nurses at the  
4 cancer centre if needed, to have “an open door”. They wanted physicians and nurses who  
5 could see them as a person, not just a patient. The importance of paying attention, making  
6 them feel that there was time enough for discussions during the consultations or visits at the  
7 cancer centre for chemotherapy, and knowing them without consulting the computer record  
8 was emphasized.  
9  
10  
11  
12  
13  
14  
15

16  
17 *“He saw the person. It was the warmth in his eyes and the way that he sat relaxed in his*  
18 *chair. I don’t remember anything from the consultation. I just remember the feeling” (patient*  
19 *18, woman aged 34 years).*  
20  
21  
22  
23

24 The participants wanted to see physicians and nurses with a holistic approach to treatment and  
25 care, who also wanted to take part in their life-world, not just the physical and mechanical  
26 components related to their disease: in other words, they wanted a compassionate physician or  
27 nurse. Furthermore, characteristics of the best physicians or nurses were emphasized as  
28 knowledge, warmth, and trust. These characteristics were important for how participants felt,  
29 for their hopes and for how they handled their disease.  
30  
31  
32  
33  
34  
35  
36  
37  
38  
39  
40

## 41 **Discussion**

42  
43 To our best knowledge, this is the first study to explore palliative colorectal cancer patients’  
44 thoughts about communication of disease information, prognoses and life expectancy, from  
45 the first time that they were informed about the incurable nature of the disease *throughout* to  
46 post-surgery palliative treatment. To deepen our understanding of the participants’  
47 experiences and reflections, we will discuss the findings in light of previous studies of  
48 patient–HCP communications of disease and life expectancy in patients with incurable cancer.  
49  
50  
51  
52  
53  
54  
55

1  
2  
3 We will apply Løgstrup's<sup>17</sup> philosophy and Mishler's<sup>18</sup> focus on the patients' voice of their  
4  
5 own life-world in patient–physician communication.

6  
7 An asymmetric relationship where the physicians hold the knowledge and expertise of  
8  
9 the disease, and the participants have to trust them was evident in our findings. As Løgstrup  
10  
11<sup>17</sup> underlines, the patients expose themselves to the situation, the message and the follow-up  
12  
13 communication. The participants wanted information about their incurable cancer in a  
14  
15 sensible and sensitive way, in a setting with enough time. However, according to several of  
16  
17 our participants, the communication in these meetings failed to give them sufficient help to  
18  
19 handle the information and their vulnerability. Importantly, the physicians who informed the  
20  
21 participants about their incurable cancer might be considered as bearers of bad news. Doctors  
22  
23 in surgical specialities are significantly more likely to be rated poorly than non-surgical  
24  
25 specialists or GPs when breaking bad news<sup>16</sup>.

26  
27  
28 For the participants in the present study, palliative chemotherapy implied hope that  
29  
30 something could be done. Previous studies have also underlined that palliative treatment  
31  
32 implies hope. Hope is an important coping strategy in such patients,<sup>26 27</sup> and has been  
33  
34 described as essential in human life. The realistic hope for most of our participants was that  
35  
36 something could be done to relieve their symptoms and potentially to postpone death, and to  
37  
38 enable ordinary everyday lives and the possibility of spending time with family and friends.  
39  
40 Therefore, the patients emphasized the importance of including hope in HCPs' communication  
41  
42 of disease, prognosis and life expectancy throughout the disease trajectory. Previous studies  
43  
44 show that there is a fine balance between telling the truth and nurturing hope,<sup>14 28</sup> and there is  
45  
46 a spectrum of hope, from hope for a cure to hope for living as normally as possible,<sup>14 28</sup>  
47  
48 which was also identified in our study.  
49  
50  
51

52  
53 It was a diversity of how detailed information the participants wanted about their  
54  
55 disease and likely future perspectives. Previous studies indicate that patients with incurable

1  
2  
3 cancer want truthful information about their disease, treatment, and likely future perspectives.  
4  
5 <sup>29 30</sup> However, there are individual preferences, and individual customized approaches seem to  
6  
7 be necessary. <sup>31 32</sup> The individual variety and preferences of our participants might be  
8  
9 considered as an important part of their life-world which should be attended to in  
10  
11 communication between patients and physicians or nurses. All the participants in the present  
12  
13 study were aware of the incurable nature of their disease. However, we did not explore their  
14  
15 accurate prognostic awareness, which was the main focus of the systematic review and meta-  
16  
17 regression analysis by Chen et al. <sup>33</sup>, who identified that only half of cancer patients with  
18  
19 advanced disease accurately understood their prognosis.  
20  
21

22 An organization of palliative treatment and care with the same well-qualified  
23  
24 physician or nurse each time they visited the cancer centre was emphasized as being  
25  
26 important for the participants. The participants seemed to prefer physician or nurse  
27  
28 communications to include what Mishler <sup>18</sup> has characterized as the “voice of medicine”,  
29  
30 which mainly focuses on the symptoms and medical and technical problems or aspects of the  
31  
32 disease, and they also wanted physicians and nurses to initiate communication focusing on the  
33  
34 participants’ inner thoughts related to their illness—what Mishler <sup>18</sup> calls the “voice of  
35  
36 lifeworld”— including more open-ended questions. Such physicians and nurses might be  
37  
38 characterized as compassionate caregivers. <sup>34</sup>  
39  
40  
41  
42  
43  
44  
45

### 46 **Implications for health care**

47  
48 It might be considered to be overly demanding and tough to be the bearer of bad news of an  
49  
50 incurable disease. Some of our participants even pointed out that surgeons who are unable to  
51  
52 give the message in an appropriate way should not communicate with patients. This indicates  
53  
54  
55

1  
2  
3 that it is a need for increased focus on communication both during university studies and in  
4  
5 hospitals.

6  
7 Physicians and nurses have extensive responsibilities in how they communicate with  
8  
9 patients with incurable disease, particularly because of the asymmetrical relationship between  
10  
11 patients and HCPs. The HCPs have knowledge of how the disease will most likely progress,  
12  
13 and also common psychological responses. However, the patients' inner thoughts and life-  
14  
15 world are not necessarily known to the HCP. The responsibility to invite or initiate  
16  
17 communication on patients' inner thoughts and to start communication focusing on these  
18  
19 issues, is in the hands of physicians and nurses. Furthermore, it is important to strive for a  
20  
21 more symmetrical relationship between patients and HPCs,<sup>17 28</sup> which will also increase the  
22  
23 possibility of shared decision-making in treatment and care.  
24  
25

26  
27 The participants preferred compassionate physicians and nurses. Being compassionate  
28  
29 requires more than empathy; it requires knowledge, proactivity and interconnectedness.<sup>34</sup>  
30  
31 Furthermore, to become a compassionate physician or nurse, training is required through  
32  
33 observation, guidance and feedback on one's own practice.<sup>34</sup> HCPs also need to be aware of  
34  
35 how much information each patient prefers, and this awareness is associated with years of  
36  
37 practice and confidence.<sup>8</sup> In addition, the treatment and care of patients undergoing palliative  
38  
39 chemotherapy should be organized in such a way that patients are able to see the same well-  
40  
41 qualified physicians and optionally also the same nurses at each consultation or visit at the  
42  
43 cancer centre.  
44  
45  
46  
47  
48

### 49 **Methodological considerations**

50  
51 The strengths of the study are that the 20 participants provided us with rich data about their  
52  
53 experiences, feelings and reflections upon HCPs' information and communication of disease  
54  
55

1  
2  
3 and life expectancy during their disease trajectory. The authors are two nurses and a  
4  
5 gynaecologist treating patients with cancer, all with clinical experience and knowledge in  
6  
7 treating and caring for several patient groups within palliative care, which were used in the  
8  
9 discussion of the findings. Qualitative content analysis aims to stay close to the data and texts  
10  
11 to reveal the findings; however, the researchers' pre-understanding might also have  
12  
13 influenced the analysis of the data.  
14

15  
16 We studied patients with one type of cancer who were in the palliative phase, which  
17  
18 can be seen as a strength. Colorectal cancer is the second most common cancer diagnosed in  
19  
20 women worldwide, and the third most common cancer diagnosed in men,<sup>19 20</sup> and the  
21  
22 knowledge could be applied to the patient group. On the other hand, studying just one patient  
23  
24 group might also limit the variance in findings that more heterogeneous groups might have  
25  
26 brought. We have limited systematic information about the participants' sociodemographic,  
27  
28 common behavior and coping mechanisms that might have influenced their experiences and  
29  
30 preferences. However, based on the few characteristics as we identified during the interviews,  
31  
32 we found variations in socio-demographic factors such as gender, age, and marital status,  
33  
34 seems to be in accordance of patients with colorectal cancer as reported in Jemal A et al.<sup>19</sup>.  
35  
36 Although our findings might not be generalizable to patients with other cancer diagnoses, the  
37  
38 findings can be transferable to hospitals with similar organisation of surgery and post-surgery  
39  
40 palliative treatments.  
41  
42  
43  
44  
45  
46  
47

## 48 **Conclusions**

49  
50 These findings provide a deeper knowledge of how patients with incurable colorectal cancer  
51  
52 in the palliative phase experience and reflect upon HCP-patient communications on disease  
53  
54 and life expectancy from before the surgery through to post-surgery chemotherapy. While the  
55

1  
2  
3 first receipt of information of having an incurable disease was experienced as insufficient,  
4  
5 post-surgery palliative chemotherapy offered some hope. The participants preferred  
6  
7 individualized information about the treatment and likely future perspectives, and HCPs with  
8  
9 a holistic approach, including an ability to focus on their life-world with compassion.  
10  
11  
12  
13  
14

### 15 **Authors 'contributions**

16  
17  
18 GR and IV were responsible for the study design  
19

20  
21 GR was responsible for the patient interviews and data collection  
22

23 GR, US and IV contributed to a critical appraisal of the analysis, manuscript preparation and  
24  
25 have read and approved the final version of the manuscript.  
26  
27  
28  
29  
30

31 **Competing interests:** The authors declare that they have no competing interests.  
32  
33

34 **Acknowledgement:** We thank the Department of Clinical Research at Sorlandet Hospital and  
35  
36 the Faculty of Health and Sport Science, University of Agder for funding the study.  
37

38 Gudrun Rohde was a visiting researcher, as an Affiliate Academic, in the Marie Curie  
39  
40 Palliative Care Research Department, University College London, January-June 2017 while  
41  
42 writing most of the paper. We wish to thank the three patients who helped us in designing the  
43  
44 study. We also want to thank all the patients who participated.  
45  
46  
47  
48

49 **Funding:** No further funding to disclose  
50  
51  
52  
53  
54  
55

**Data sharing statement:** All data are published, and therefore there is no additional data available. Owing to the sensitive nature of the information and appropriate medical ethics, access to the raw data set will be reviewed on request.

## References

1. McRee AJ, Goldberg RM. Optimal management of metastatic colorectal cancer: current status. *Drugs* 2011;71(7):869-84.
2. Cameron J, Waterworth S. Patients' experiences of ongoing palliative chemotherapy for metastatic colorectal cancer: a qualitative study. *International journal of palliative nursing* 2014;20(5):218-24. [published Online First: 2014/05/24]
3. Cameron MG, Kersten C, Guren MG, et al. Palliative pelvic radiotherapy of symptomatic incurable prostate cancer - a systematic review. *Radiother Oncol* 2014;110(1):55-60. doi: 10.1016/j.radonc.2013.08.008 [published Online First: 2013/09/21]
4. Cameron MG, Kersten C, Vistad I, et al. Palliative pelvic radiotherapy for symptomatic rectal cancer - a prospective multicenter study. *Acta Oncol* 2016;55(12):1400-07. doi: 10.1080/0284186x.2016.1191666 [published Online First: 2016/06/23]
5. Hancock K, Clayton JM, Parker SM, et al. Truth-telling in discussing prognosis in advanced life-limiting illnesses: a systematic review. *Palliat Med* 2007;21(6):507-17. doi: 10.1177/0269216307080823 [published Online First: 2007/09/12]
6. Hagerty RG, Butow PN, Ellis PM, et al. Communicating prognosis in cancer care: a systematic review of the literature. *Ann Oncol* 2005;16(7):1005-53. doi: 10.1093/annonc/mdj211 [published Online First: 2005/06/09]
7. Chou WS, Hamel LM, Thai CL, et al. Discussing prognosis and treatment goals with patients with advanced cancer: A qualitative analysis of oncologists' language. *Health expectations : an international journal of public participation in health care and health policy* 2017;20(5):1073-80. doi: 10.1111/hex.12549 [published Online First: 2017/03/07]



- 1
  - 2
  - 3
  - 4
  - 5
  - 6
  - 7
  - 8
  - 9
  - 10
  - 11
  - 12
  - 13
  - 14
  - 15
  - 16
  - 17
  - 18
  - 19
  - 20
  - 21
  - 22
  - 23
  - 24
  - 25
  - 26
  - 27
  - 28
  - 29
  - 30
  - 31
  - 32
  - 33
  - 34
  - 35
  - 36
  - 37
  - 38
  - 39
  - 40
  - 41
  - 42
  - 43
  - 44
  - 45
  - 46
  - 47
  - 48
  - 49
  - 50
  - 51
  - 52
  - 53
  - 54
  - 55
  - 56
  - 57
  - 58
  - 59
  - 60
8. Rogg L, Aasland OG, Graugaard PK, et al. Direct communication, the unquestionable ideal? Oncologists' accounts of communication of bleak prognoses. *Psychooncology* 2010;19(11):1221-28.
9. Martinsson L, Axelsson B, Melin-Johansson C. Patients' perception of information from physicians during palliative chemotherapy: a qualitative study. *Psychooncology* 2016;14(5):495-502. doi: 10.1017/S1478951515001200
10. Murray CD, McDonald C, Atkin H. The communication experiences of patients with palliative care needs: A systematic review and meta-synthesis of qualitative findings. *Palliative & supportive care* 2015;13(2):369-83. doi: 10.1017/s1478951514000455 [published Online First: 2014/05/03]
11. Kirk P, Kirk I, Kristjanson LJ. What do patients receiving palliative care for cancer and their families want to be told? A Canadian and Australian qualitative study. *BMJ* 2004;328(7452):1343. doi: 10.1136/bmj.38103.423576.55 [published Online First: 2004/05/21]
12. Butow PN, Dowsett S, Hagerty R, et al. Communicating prognosis to patients with metastatic disease: what do they really want to know? *Support Care Cancer* 2002;10(2):161-8. doi: 10.1007/s005200100290 [published Online First: 2002/02/28]
13. Clarke MG, Kennedy KP, MacDonagh RP. Discussing life expectancy with surgical patients: do patients want to know and how should this information be delivered? *BMC medical informatics and decision making* 2008;8:24. doi: 10.1186/1472-6947-8-24 [published Online First: 2008/06/17]
14. Clayton JM, Butow PN, Arnold RM, et al. Fostering coping and nurturing hope when discussing the future with terminally ill cancer patients and their caregivers. *Cancer* 2005;103(9):1965-75. doi: 10.1002/cncr.21011 [published Online First: 2005/03/25]
15. Stajduhar KI, Thorne SE, McGuinness L, et al. Patient perceptions of helpful communication in the context of advanced cancer. *J Clin Nurs* 2010;19(13-14):2039-47. doi: 10.1111/j.1365-2702.2009.03158.x [published Online First: 2010/10/06]
16. Barnett MM. Effect of breaking bad news on patients' perceptions of doctors. *Journal of the Royal Society of Medicine* 2002;95(7):343-7. [published Online First: 2002/07/02]
17. Løgstrup KE. The ethical demand. Notre Dame, Ill: University of Notre Dame Press 1997.
18. Mishler, EG. The Discourse of Medicine - Dialectics of Medical Interviews. New Jersey: Ablex Publishing Corporation, Norwood, New Jersey 1984.
19. Jemal A, Center MM, DeSantis C, et al. Global patterns of cancer incidence and mortality rates and trends. *Cancer Epidemiol Biomarkers Prev* 2010;19(8):1893-907. doi: 10.1158/1055-9965.epi-10-0437 [published Online First: 2010/07/22]
20. Torre LA, Bray F, Siegel RL, et al. Global cancer statistics, 2012. *CA Cancer J Clin* 2015;65(2):87-108. doi: 10.3322/caac.21262 [published Online First: 2015/02/06]
21. Crabtree BF, Miller WL. Doing qualitative research. Thousand Oaks, Calif.: Sage 1999.
22. Rohde G, Kersten C, Vistad I, et al. Spiritual Well-being in Patients With Metastatic Colorectal Cancer Receiving Noncurative Chemotherapy: A Qualitative Study. *Cancer Nurs* 2016 doi: 10.1097/ncc.0000000000000385 [published Online First: 2016/04/22]
23. Polit DF. Essentials of nursing research: methods, appraisal, and utilization. Philadelphia: Lippincott Williams & Wilkins 2006.
24. Beauchamp TL, Childress JF. Principles of biomedical ethics. 7th ed. ed. New York: Oxford University Press 2013.
25. WMA Declaration of Helsinki. Ethical Principles for Medical Research Involving Human Subjects 2013 [Available from: <http://www.wma.net/en/30publications/10policies/b3/>].

- 1
- 2
- 3 26. Hegarty M. The Dynamic of Hope: Hoping in the Face of Death. *Progress in Palliative*
- 4 *Care* 2001;9(2):42-46. doi: 10.1080/09699260.2001.11746903
- 5 27. Rustoen T. Hope and quality of life, two central issues for cancer patients: a theoretical
- 6 analysis. *Cancer Nurs* 1995;18(5):355-61. [published Online First: 1995/10/01]
- 7 28. Clayton JM, Butow PN, Arnold RM, et al. Discussing life expectancy with terminally ill
- 8 cancer patients and their carers: a qualitative study. *Support Care Cancer*
- 9 2005;13(9):733-42. doi: 10.1007/s00520-005-0789-4 [published Online First:
- 10 2005/03/12]
- 11 29. Miccinesi G, Bianchi E, Brunelli C, et al. End-of-life preferences in advanced cancer
- 12 patients willing to discuss issues surrounding their terminal condition. *Eur J Cancer*
- 13 *Care (Engl)* 2012;21(5):623-33. doi: 10.1111/j.1365-2354.2012.01347.x [published
- 14 Online First: 2012/04/24]
- 15 30. Hagerty RG, Butow PN, Ellis PA, et al. Cancer patient preferences for communication of
- 16 prognosis in the metastatic setting. *J Clin Oncol* 2004;22(9):1721-30. doi:
- 17 10.1200/jco.2004.04.095 [published Online First: 2004/05/01]
- 18 31. Mackenzie LJ, Carey ML, Paul CL, et al. Do we get it right? Radiation oncology
- 19 outpatients' perceptions of the patient centredness of life expectancy disclosure.
- 20 *Psychooncology* 2013;22(12):2720-8. doi: 10.1002/pon.3337 [published Online First:
- 21 2013/06/27]
- 22 32. Walczak A, Butow PN, Davidson PM, et al. Patient perspectives regarding
- 23 communication about prognosis and end-of-life issues: how can it be optimised?
- 24 *Patient Educ Couns* 2013;90(3):307-14. doi: 10.1016/j.pec.2011.08.009 [published
- 25 Online First: 2011/09/17]
- 26 33. Chen CH, Kuo SC, Tang ST. Current status of accurate prognostic awareness in
- 27 advanced/terminally ill cancer patients: Systematic review and meta-regression
- 28 analysis. *Palliat Med* 2017;31(5):406-18. doi: 10.1177/0269216316663976 [published
- 29 Online First: 2016/08/06]
- 30 34. Larkin PJ. *Compassion - The Essence of Palliative and End-of-life Care*. First ed. New
- 31 York: Oxford University Press 2016.
- 32
- 33
- 34
- 35
- 36
- 37
- 38
- 39
- 40
- 41
- 42
- 43
- 44
- 45
- 46
- 47
- 48
- 49
- 50
- 51
- 52
- 53
- 54
- 55
- 56
- 57
- 58
- 59
- 60

**Table 1:** Characteristics of patients receiving non-curative chemotherapy.

|                                                 | First-line ( <i>n</i> = 12) | Second-line ( <i>n</i> = 8) |
|-------------------------------------------------|-----------------------------|-----------------------------|
| Women                                           | 5                           | 3                           |
| Men                                             | 7                           | 5                           |
| Mean age (range), years                         | 63 (34–75)                  | 69 (64–75)                  |
| Marital status:                                 |                             |                             |
| Married/cohabiting                              | 10                          | 8                           |
| Single                                          | 1                           |                             |
| Widow/widower                                   | 1                           |                             |
| Chemotherapy used:                              |                             |                             |
| Fliri/bevacizumab                               | 10                          |                             |
| Flox (5-fluorouracil, folnic acid, axaliplatin) | 1                           | 8                           |
| Capecitabine plus oxaliplatin (Xelox)           | 1                           |                             |

All patients received 5-fluorouracil-based combination chemotherapy with irinotecan or oxaliplatin, +/- bevacizumab.

**Table 1**

Consolidated criteria for reporting qualitative studies (COREQ): 32-item checklist

| No                                             | Item                                     | Guide questions/description                                                           |
|------------------------------------------------|------------------------------------------|---------------------------------------------------------------------------------------|
| <b>Domain 1: Research team and reflexivity</b> |                                          |                                                                                       |
| Personal Characteristics                       |                                          |                                                                                       |
| 1.                                             | Interviewer/facilitator                  | G Rohde (All interviews), p 7                                                         |
| 2.                                             | Credentials                              | PhD and professors, p 1                                                               |
| 3.                                             | Occupation                               | Professors, p 1                                                                       |
| 4.                                             | Gender                                   | All female, p 7                                                                       |
| 5.                                             | Experience and training                  | All were trained researchers, p 7                                                     |
| Relationship with participants                 |                                          |                                                                                       |
| 6.                                             | Relationship established                 | No relationship before the interviews, p 7                                            |
| 7.                                             | Participant knowledge of the interviewer | The participants did not know the interviewer, p 7                                    |
| 8.                                             | Interviewer characteristics              | Nurse and professor and had interests for the topic, p 7                              |
| <b>Domain 2: study design</b>                  |                                          |                                                                                       |
| Theoretical framework                          |                                          |                                                                                       |
| 9.                                             | Methodological orientation and Theory    | Content analysis, p7                                                                  |
| Participant selection                          |                                          |                                                                                       |
| 10.                                            | Sampling                                 | The patients physicians asked if the researcher could contact them for inclusion, p 6 |
| 11.                                            | Method of approach                       | Face-to-face, p 7                                                                     |
| 12.                                            | Sample size                              | Twenty patients (Twelve men and eight women), p 6                                     |

| No                                      | Item                           | Guide questions/description                                                                  |
|-----------------------------------------|--------------------------------|----------------------------------------------------------------------------------------------|
| 13.                                     | Non-participation              | We have limited information about this, p 6                                                  |
| Setting                                 |                                |                                                                                              |
| 14.                                     | Setting of data collection     | Out-patient clinic and patients home (one patient), p 7                                      |
| 15.                                     | Presence of non-participants   | Non, p 6                                                                                     |
| 16.                                     | Description of sample          | Patients with metastatic colorectal cancer receiving non-curative chemotherapy, p 6          |
| Data collection                         |                                |                                                                                              |
| 17.                                     | Interview guide                | The interview guide was made by the researchers, p 7 and 8                                   |
| 18.                                     | Repeat interviews              | No repeated interviews were performed, p 7                                                   |
| 19.                                     | Audio/visual recording         | Audio recording was used to collect the data, p 7                                            |
| 20.                                     | Field notes                    | Field notes were made after the interviews, not stated in the manuscript                     |
| 21.                                     | Duration                       | 50-100 minutes, p 7                                                                          |
| 22.                                     | Data saturation                | Data saturation was discussed and reached, p 7                                               |
| 23.                                     | Transcripts returned           | The transcripts were not returned to participants for comments, not stated in the manuscript |
| <b>Domain 3: analysis and findingsz</b> |                                |                                                                                              |
| Data analysis                           |                                |                                                                                              |
| 24.                                     | Number of data coders          | one, p 8                                                                                     |
| 25.                                     | Description of the coding tree | The authors provided a description of the coding, p 8                                        |
| 26.                                     | Derivation of themes           | The themes were derived from the data, p 8                                                   |

| No        | Item                         | Guide questions/description                                                              |
|-----------|------------------------------|------------------------------------------------------------------------------------------|
| 27.       | Software                     | none                                                                                     |
| 28.       | Participant checking         | The participants did not provide feedback on the findings, not written in the manuscript |
| Reporting |                              |                                                                                          |
| 29.       | Quotations presented         | The quotations presented illustrate the themes / findings, p 9 - 14                      |
| 30.       | Data and findings consistent | There was consistency between the data presented and the findings p 8 - 14               |
| 31.       | Clarity of major themes      | Major themes were clearly presented in the findings, p 8                                 |
| 32.       | Clarity of minor themes      | No                                                                                       |

# BMJ Open

## Reflections by patients with colorectal cancer undergoing palliative care on communication of disease prognosis and life expectancy by health care professionals

|                                 |                                                                                                                                                                                                                                                                                                                                                                                      |
|---------------------------------|--------------------------------------------------------------------------------------------------------------------------------------------------------------------------------------------------------------------------------------------------------------------------------------------------------------------------------------------------------------------------------------|
| Journal:                        | <i>BMJ Open</i>                                                                                                                                                                                                                                                                                                                                                                      |
| Manuscript ID                   | bmjopen-2018-023463.R3                                                                                                                                                                                                                                                                                                                                                               |
| Article Type:                   | Research                                                                                                                                                                                                                                                                                                                                                                             |
| Date Submitted by the Author:   | 23-Dec-2018                                                                                                                                                                                                                                                                                                                                                                          |
| Complete List of Authors:       | Rohde, Gudrun; University of Agder, Faculty of Health and Sport Sciences; Sorlandet Hospital , Department of Clinical Research Söderhamn, Ulrika; University of Agder, Centre for Caring Research – Southern Norway, Department of Health and nursing Sciences, Faculty of Health and Sport Sciences<br>Vistad, Ingvild ; Sorlandet Hospital Kristiansand , Obstetric and gynecology |
| <b>Primary Subject Heading</b>: | Palliative care                                                                                                                                                                                                                                                                                                                                                                      |
| Secondary Subject Heading:      | Communication                                                                                                                                                                                                                                                                                                                                                                        |
| Keywords:                       | palliative care information, vulnerability, life-world, compassion                                                                                                                                                                                                                                                                                                                   |
|                                 |                                                                                                                                                                                                                                                                                                                                                                                      |

SCHOLARONE™  
Manuscripts

1  
2  
3 **New title: Reflections by patients with colorectal cancer undergoing palliative care on**  
4 **communication of disease prognosis and life expectancy by health care professionals**  
5  
6  
7  
8  
9

10 **Authors:**

11  
12 Gudrun Rohde, PhD (Corresponding author)

13  
14 Professor, University of Agder, Faculty of Health and Sport Sciences and Department of

15  
16 Clinical Research, Sorlandet Hospital Kristiansand

17  
18 Postbox 422, 4604 Kristiansand, Norway

19  
20 Phone: +47 99164094

21  
22 Email: ([gudrun.e.rohde@uia.no](mailto:gudrun.e.rohde@uia.no))  
23  
24  
25  
26  
27

28  
29 Ulrika Söderhamn, PhD

30  
31 Professor

32  
33 University of Agder, Faculty of Health and Sport Sciences

34  
35 Postbox 509

36  
37 4898 Grimstad, Norway

38  
39 Phone: +47 416 98 753

40  
41  
42 Email: [Ulrika.soderhamn@uia.no](mailto:Ulrika.soderhamn@uia.no)  
43  
44  
45  
46  
47

48  
49 Ingvild Vistad, MD PhD

50  
51 Department of Obstetrics and Gynecology, Sorlandet Hospital HF, Kristiansand

52  
53 Gynaecologist and Professor

54  
55 Postbox 416, 4604 Kristiansand, Norway

56  
57 Phone: +47 97532316

58  
59 Email: [Ingvild.vistad@sshf.no](mailto:Ingvild.vistad@sshf.no)  
60



1  
2  
3  
4  
5  
6  
7  
8  
9  
10  
11  
12  
13  
14  
15  
16  
17  
18  
19  
20  
21  
22  
23  
24  
25  
26  
27  
28  
29  
30  
31  
32  
33  
34  
35  
36  
37  
38  
39  
40  
41  
42  
43  
44  
45  
46  
47  
48  
49  
50  
51  
52  
53  
54  
55  
56  
57  
58  
59  
60

For peer review only

**Abstract:**

**Objectives** Patients with colorectal cancer undergoing palliative treatment receive extensive treatment-related information throughout their disease trajectory. We aimed to explore the experiences of patients with incurable colorectal cancer while in palliative care and their reflections upon the information provided by physicians and nurses. Our main focus was the patients' thoughts about how information about disease status and life expectancy was communicated, from the first time that they were informed about the incurable nature of their disease through to post-surgery palliative treatment.

**Settings** Patients with colorectal cancer receiving palliative chemotherapy.

**Research design** We used a qualitative approach, and the data were analysed by qualitative content analysis.

**Participants** Twenty patients (34–75 years of age) were included in the study; 12 received first-line chemotherapy, and eight received second-line chemotherapy. Eleven patients were treated by oncologists, and nine were treated by junior physicians.

**Results** Data-driven empirical analysis identified three themes: (1) inadequate information during the initial phase of the disease trajectory; (2) hope and information further into the disease trajectory; and (3) personal, professional and organizational factors that influenced information and communication throughout the disease trajectory.

**Conclusion** The participants' experience of being told for the first time that they had an incurable disease was perceived as inadequate, while post-surgery palliative chemotherapy, physicians and nurses offered hope. The participants preferred customized information about their treatment and likely future prospects and physicians and nurses who took a holistic and compassionate approach focusing on their life-world. To be a sensitive, holistic and compassionate physician or nurse requires knowledge and confidence. To achieve this requires training and guidance at universities and in hospitals.

### Strengths and limitations of the study

- In-depth and rich knowledge derived from the thoughts of 20 patients undergoing palliative care for colorectal cancer about how information about their disease, prognosis and life expectancy was communicated, starting from the first time that they were told that they had an incurable disease through to their post-surgery treatment.
- The qualitative design revealed that patients with colorectal cancer undergoing palliative care prefer health care professionals who are compassionate at all stages of their disease trajectory.
- It could be seen as a limitation that the study focused on one group of patients in palliative care, because this could limit the variation in findings that might have been evident with inclusion of more heterogeneous groups.
- We interviewed the patients at only one time point during chemotherapy and their memory about receiving their first information relating to their disease may have been coloured by later experiences.

**Key words:** palliative care information; vulnerability; life-world, compassion

## Background

Patients with cancer who are treated with palliative intent receive extensive amounts of disease-related information from the first time they are informed about the incurable nature of their disease through the following months or years of treatment and care.<sup>1-4</sup> Guidelines encourage health care professionals (HCPs) such as physicians and nurses to keep patients informed and to discuss their prognoses and likely future prospects. However, many HCPs and patients struggle to find the right approach for these discussions,<sup>5-9</sup> and a primary focus on open communication regarding the bleak prospects for the patient's life expectancy entails a risk of overwhelming the individual's need for information and their hope.<sup>10</sup> In-depth studies of patients' experiences about information given by physicians and nurses throughout their disease trajectory are needed to guide HCPs in how to communicate to patients undergoing palliative care information about their diagnosis and life expectancy.

Most studies focusing on patient-HCP communications about disease and prognosis in patients with incurable cancer are quantitative and involve patients at either an early or late stage of the disease.<sup>6-11</sup> Qualitative studies report divergent results regarding the patient's acceptance of the chronic and incurable nature of their disease and the presentation of their prognosis.<sup>11-17</sup> Patients request that both disease- and illness-oriented information be provided by caring and trusted HCPs.<sup>13 14 17</sup>

Patients with cancer undergoing palliative treatment are vulnerable, and good patient-HCP relationships are important.<sup>18</sup> The philosopher Løgstrup<sup>19</sup> emphasized the importance of trust and the patients' vulnerability in such relationships, while Mishler<sup>20</sup> distinguished between the voice of medicine (the technical-scientific assumptions of medicine) and the voice of the life-world (the natural attitudes of everyday life) in patient-physician communication. Mishler suggested an increased attentiveness to the voice of the patients in

1  
2  
3 terms of their life-world, especially in vulnerable individuals such as patients in palliative  
4  
5 care.  
6

7  
8 Patients often experience a life crisis when they are informed that their cancer is  
9  
10 incurable.<sup>21</sup> Over time, the majority adjust to their new life situation, and during this time,  
11  
12 their preferences and experiences regarding information and communication might *change*.<sup>18</sup>  
13  
14 Although colorectal cancer is one of the most common types of cancer,<sup>21 22</sup> there is limited  
15  
16 knowledge about how this patient group views information and communication about disease  
17  
18 and life expectancy *throughout* their disease trajectory, because most studies include  
19  
20 heterogeneous groups of patients. Treatment for colorectal cancer usually involves surgical  
21  
22 removal of the tumour followed by adjuvant chemotherapy. Thus, most patients with  
23  
24 colorectal cancer tend to have a similar disease trajectory, and knowledge about their  
25  
26 experience and information preferences might be valuable to give patients better palliative  
27  
28 care.  
29  
30  
31

32  
33 We aimed to explore the experiences of patients with incurable colorectal cancer and  
34  
35 their reflections upon information provided by physicians and nurses while they were in  
36  
37 palliative care. Our main focus was the patients' thoughts about how information about their  
38  
39 disease, prognosis and life expectancy was communicated, from the first time that they were  
40  
41 told that their disease was incurable through to post-surgery palliative treatment.  
42  
43  
44

## 45 **Methods**

46  
47  
48 We chose a qualitative inductive approach using in-depth interviews.<sup>23</sup> As part of a larger  
49  
50 study,<sup>24</sup> we invited patients with metastatic colorectal cancer who were referred for palliative  
51  
52 chemotherapy at three regional hospitals in Southern Norway to participate in this study.  
53  
54 Oncologists informed patients about the study at the outpatient clinics when they attended for  
55  
56 the second or third cycle of chemotherapy. Most participants were informed of their incurable  
57  
58 diagnosis by surgeons, except for two who were informed by their general practitioners (GPs).  
59  
60

1  
2  
3 All participants had undergone surgery for their cancer, and most had their surgery at  
4 relatively small hospitals, with surgeons being mainly responsible for the patients' care and  
5 the communication in this phase. The participants spent only a few days in the surgery  
6 department with teams including few HCPs. Subsequently, chemotherapy was provided at an  
7 oncological outpatient clinic where oncologists were mainly responsible for the treatment.  
8  
9  
10  
11  
12  
13  
14  
15 The participants visited the outpatient clinic for weeks or months.

16  
17 The patients were eligible for inclusion if they were aged 18 years or older, had  
18 metastatic colorectal cancer, had undergone surgery for their cancer, had been referred for  
19 first- or second-line palliative chemotherapy, had a life expectancy of >6 months and were  
20 able to give written informed consent. We included consecutive patients of different ages and  
21 marital status and with varying demographic and clinical characteristics.<sup>25</sup> We excluded  
22 patients with any significant comorbidity that could compromise their life expectancy, or who  
23 were unable to understand or read Norwegian. Patients with conditions that the physician  
24 believed could affect the patient's ability to understand or cope with the questions were  
25 considered ineligible, including patients who were considered to be too emotionally  
26 vulnerable ( $n = 4$ ).

27  
28  
29  
30  
31  
32  
33  
34  
35  
36  
37  
38  
39  
40 Twenty patients with colorectal cancer (34–75 years of age) were invited to participate  
41 in the study over a period of 1 year, and all accepted the invitation. All patients received  
42 combination chemotherapy (Table 1) and had few physical symptoms related to their disease.  
43  
44  
45  
46  
47  
48  
49  
50  
51  
52  
53  
54  
55  
56  
57  
58  
59  
60  
The sample comprised 12 patients receiving first-line chemotherapy (five women and seven  
men) and eight receiving second-line chemotherapy (three women and five men). Eleven  
patients were treated by oncologists, and nine were treated by junior physicians.

<Table 1 about here>

## Data collection

The same researcher (GR) conducted all the interviews. One interview took place at the patient's home, and the other interviews took place at the cancer centre or outpatient clinics at a time when the patients had an appointment. The researchers did not know the patients before the interviews and did not treat the patients. The meetings were in-depth interviews lasting 50–100 minutes using a semi-structured interview guide to ensure inclusion of the issues in focus,<sup>23</sup> and questions such as: “What do you think about the first information that you received about your disease and its prognosis?”, “How was information provided about the follow-up chemotherapy and likely future prospects?”, “Have you received the information that you expected or is there anything missing?”, and “What things are important when giving information about your disease and prognosis, and how do you want it to be given/delivered?” After conducting 11 interviews, we did some preliminary analyses and made minor changes to the interview guide to obtain more data on issues that needed to be expanded to address the research aim; for example, “What characterized the good information that you received versus other information that you were not happy with?” Patients were included until data saturation was achieved, as indicated by only minor new information being obtained in interviews 19 and 20.<sup>23</sup> At 2–4 days after each interview, GR contacted the patient and asked whether the interview had influenced him or her negatively. No patient experienced a negative influence or reaction.

## Analysis

We audiotaped and transcribed the interviews verbatim and made logs after each interview. The data were analysed by qualitative content analysis to identify the themes in the data. For the analyses, we (i) read all the interviews to understand the meaning of the whole text, (ii) investigated sentences or sections to clarify their meaning and to facilitate the identification of themes, (iii) related sentences or sections to the meaning of the whole text and (iv) identified

1  
2  
3 passages representative of shared understanding between the researchers and participants. To  
4  
5 support the analysis, we created mind maps and discussed the analysis. The analysis steps  
6  
7 were followed carefully, which increased the reliability of the study. Quotations are used to  
8  
9 illustrate and support the findings, which increases their trustworthiness. To validate the  
10  
11 findings, all authors participated in discussions of the empirical analysis and in writing up the  
12  
13 findings. In the discussion, the findings were interpreted in light of our previous  
14  
15 understanding. GR and US are both nurses and professors in health sciences with clinical  
16  
17 experience in palliative care. IV is a gynaecologist and professor who also has extensive  
18  
19 experience in treating patients with cancer who are undergoing palliative care.  
20  
21  
22  
23  
24

### 25 **Ethics**

26  
27 Voluntariness and confidentiality were assured during the collection, handling and reporting  
28  
29 of data.<sup>26 27</sup> The study was approved by the Regional Committee for Medical Research Ethics  
30  
31 (REK South-East 2011/2464).  
32  
33  
34

### 35 **Patient involvement**

36  
37 Before we started the study, we conducted three pilot interviews with cancer patients to test  
38  
39 the study design and the interview guide, and made minor changes to the guide. These  
40  
41 interviews were not included in the study. There was no further patients' involvement. The  
42  
43 findings are given in this publication.  
44  
45  
46  
47

### 48 **Findings**

49  
50 Through data-driven empirical analysis, we identified three themes: (1) inadequate  
51  
52 information during the initial phase of the disease trajectory; (2) hope and information further  
53  
54 into the disease trajectory; and (3) personal, professional and organizational factors that  
55  
56 influenced information and communication throughout the disease trajectory. We did not  
57  
58 identify any differences between participants receiving first- or second-line chemotherapy.  
59  
60



### Inadequate information during the initial phase of the disease trajectory

The news that their cancer was incurable was given to patients at the surgical department or by the patient's GP. Overall, how patients experienced receiving this information varied: it could have been given earlier, it was experienced as a shock, it was insufficient, it was given in an inappropriate way or at an inappropriate place. However, some reported that they were satisfied with the way the information was given.

A few participants had to wait a long time (weeks or months) from their first concern about the disease until they were examined or had an appointment at the hospital. When the cancer was finally diagnosed, they received limited apologies for the delay from the physicians, and emphasized that an apology would have made the situation easier to handle. Some had not even felt particularly ill, and it was hard for them to understand the message from the physician that they had an incurable disease. Several participants experienced the first information about the incurable nature of their disease as a shock.

*“When the surgeon gave me the message that my disease was incurable, I was shocked, I didn't feel that anything was wrong. I asked him how long I had left to live. He just shrugged and didn't have any answer. The conversation took 8 minutes” (patient 4, woman aged 54 years).*

We did not identify any difference between the two participants who received the news from their GP compared with those who received it from their surgeon.

Some participants felt that the information given before and after their surgery was insufficient. The information was brief, there was no time after the surgery for further communication, and a few participants felt that the HCPs had not told them the whole truth. They would have liked more answers and sufficient communication with the surgeon.

1  
2  
3 *“I think she gave the message in three sentences. She said I had metastatic cancer. That’s it. I*  
4 *asked what it meant. ‘I don’t know’ she replied” (patient 6, man 73 years).*

5  
6  
7  
8  
9 In contrast, some of the participants, males in particular, expressed satisfaction with  
10 how the surgeon had given pre- and postoperative information and explained the surgery, its  
11 consequences and likely future treatment-related effects, e.g., challenges with the stoma or the  
12 risk of impotence after the operation.

13  
14  
15  
16  
17  
18  
19 *“I was happy with the information the surgeon gave. I am a person who asks questions, and I*  
20 *am not afraid of asking. I received the answers I needed” (patient 15, man aged 73 years).*

21  
22  
23  
24 A few participants reported that surgeons or GPs had given them the news in an  
25 inappropriate way or at an inappropriate place (e.g., in a small examination room) and they  
26 experienced this as an extra burden. Further questions from the participants were answered to  
27 a limited extent, if at all. It was challenging to be told that their cancer could not be cured. A  
28 few participants received the message that a complete tumour resection was impossible or that  
29 very little could be done. Such messages were experienced as a death sentence.

30  
31  
32  
33  
34  
35  
36  
37  
38  
39 *“It’s important to tell the truth, but in an appropriate way. ‘Go home and die’. That’s not*  
40 *appropriate” (patient 4, woman aged 54 years).*

41  
42  
43  
44  
45 Although the message was brutal to hear, a few participants admitted that a straightforward  
46 message was probably the best way.

#### 47 48 49 50 **Hope and information further into the disease trajectory**

51  
52  
53 Post-surgery chemotherapy and further information and care were offered/given at the cancer  
54 centre. Hope was offered by the palliative chemotherapy itself, as well as by physicians and  
55 nurses, and there was variation in how much and how precise information the participants  
56 preferred in this phase.  
57  
58  
59  
60

1  
2  
3 When the participants started their post-surgery chemotherapy, some time had passed  
4 and further treatment implied hope that something could be done after all. The behaviour and  
5 attitudes of physicians and nurses also offered hope. At the cancer centre, the participants  
6 were met with openness, knowledge and sufficient time. The participants experienced that the  
7 physicians postponed death by offering chemotherapy, and the importance of including hope  
8 in patient communication was emphasized.  
9

10  
11  
12  
13  
14  
15  
16  
17  
18 *“She asked about my background, she saw more than my illness. She looks at you. She gives*  
19 *you hope. That is how I want to be met” (Patient 4, woman aged 54 years).*  
20  
21  
22

23 The participants’ hopes seemed to change from before they were diagnosed with their  
24 incurable disease and through their disease trajectory. Physicians and nurses at the cancer  
25 centre conveyed that they would try to delay disease progress and relieve pain and symptoms.  
26 Even though they recognized that their cancer was incurable, most participants hoped that  
27 they would be among those who could live for years despite a poor prognosis. As the disease  
28 progressed, they hoped for good days, not extraordinary things or experiences, and for some  
29 participants there seemed to be a change in goals and values.  
30  
31  
32  
33  
34  
35  
36  
37  
38

39 Correct and truthful information about their disease, treatment effects, side effects,  
40 metastases and likely future prospects was important for the participants. Preferences varied  
41 regarding the amount of information they wanted to receive and at which time point. Some  
42 participants wanted a total overview of their disease and prognosis from the start, some  
43 wanted a smaller amount of information at that time, while others wanted their body to tell  
44 them how their disease was progressing.  
45  
46  
47  
48  
49  
50  
51  
52  
53

54 *“I don’t want to know the exact date. I would like information about disease progression and*  
55 *prognosis bit by bit, or let my body tell me bit by bit” (patient 17, woman aged 71 years).*  
56  
57  
58  
59  
60

1  
2  
3 Some participants found vague information about likely prospects confusing. In  
4 particular, some of the male participants wanted straightforward information.  
5  
6

7  
8 *“I would like to know even more if it is possible. I don’t want them to keep any information*  
9 *back. I would like to have a better overview and know what to expect in the future” (patient*  
10 *13, man aged 68 years).*  
11  
12  
13  
14

15  
16 During palliative chemotherapy, the participants had different experiences of receiving  
17 information about their life expectancy. Some found the information to be adequate, while  
18 others claimed that they had received non-specific information on this topic, if anything at all.  
19  
20  
21  
22

23  
24 *“They haven’t said much about life expectancy. However, the treatment is palliative. They*  
25 *haven’t given me the time. And I haven’t asked” (patient 7, man aged 63 years).*  
26  
27  
28

### 29 30 **Personal, professional and organizational factors that influenced information and** 31 **communication throughout the disease trajectory** 32 33

34 Throughout their disease trajectory, the participants had experiences and preferences relating  
35 to personal, professional and organizational factors that influenced information and  
36 communication. The participants experienced that in the surgery department, there was  
37 limited time for information and communication. They preferred HCPs who were  
38 knowledgeable and took a holistic approach, and that their health care be organized in such a  
39 way that it was possible to meet the same well-qualified HCPs.  
40  
41  
42  
43  
44  
45  
46  
47

48 Most participants met the surgeon once before the surgery and spent only a few days  
49 in the surgery department. Some experienced that there was too little time for information and  
50 communication.  
51  
52  
53  
54  
55  
56  
57  
58  
59  
60

1  
2  
3 *“I only received a small amount of information at the surgical department. They just sent me*  
4 *home. You’re finished, you can leave. I would have liked more answers” (patient 20, man 74*  
5 *years).*  
6  
7  
8  
9

10  
11 The combination of the professional knowledge and personality of the HCPs was  
12 emphasized as important. The participants strongly appreciated physicians and nurses who  
13 had enough time for them and who knew them and their disease. One participant  
14 characterized this as follows.  
15  
16  
17  
18

19  
20  
21 *“She is an oncologist with a heart and a brain” (patient 4, woman 54 years).*  
22  
23

24 The participants wanted physicians and nurses who could see them as a person, not  
25 just as a patient. They emphasized the importance of the HCP paying attention, making them  
26 feel that there was time enough for discussions during the consultations or visits at the cancer  
27 centre for chemotherapy, and knowing them without consulting the computer record.  
28  
29  
30  
31  
32

33  
34 *“He saw the person. It was the warmth in his eyes and the way that he sat relaxed in his*  
35 *chair. I don’t remember much from the consultation. I just remember the feeling” (patient 18,*  
36 *woman aged 34 years).*  
37  
38  
39  
40  
41

42 The participants also wanted to see physicians and nurses who took a holistic approach  
43 to treatment and care, who took part in their life-world, not just the physical and mechanical  
44 components related to their disease; in other words, they wanted a compassionate physician or  
45 nurse. Indeed, the characteristics of the best physicians or nurses were emphasized as  
46 knowledge, warmth and trust, because such qualities were important for how the participants  
47 felt, for their hopes and for how they dealt with their disease.  
48  
49  
50  
51  
52  
53  
54  
55  
56  
57  
58  
59  
60

1  
2  
3 *“When I come to the cancer centre, I feel it’s about me. I know there are hundreds of people*  
4 *coming and going. But every time I come, I feel that they are taking care of me” (patient 6,*  
5  
6 *man 72 years)*  
7  
8  
9

10  
11 The participants preferred to be treated by knowledgeable HCPs who were able to  
12 answer questions. Some felt insecure if they were treated by a junior physician who could not  
13 answer all their questions.  
14  
15  
16

17  
18  
19 *“I would have felt more secure if I was treated by a specialist, one who didn’t have to ask*  
20 *colleagues to be sure. At least occasionally” (patient 11, man aged 60 years).*  
21  
22

23  
24 Furthermore, the participants preferred to receive their test results immediately rather  
25 than to wait until their next appointment at the outpatient clinic or the cancer centre.  
26  
27  
28

29  
30 *“There were minor changes after the last computer tomography. The oncologist telephoned*  
31 *and told me the results. I didn’t have to wait for the next appointment, I didn’t have to worry*  
32 *until then” (patient 17, woman aged 71 years).*  
33  
34  
35

36  
37  
38 Most participants wanted their health care and treatment to be organized in such a way  
39 that it was possible to see the same physician at each consultation, and they appreciated small  
40 units/departments. The participants appreciated the possibility of contacting the physicians  
41 and nurses if needed, to have “an open door”. Some of those who had to alternate between  
42 different physicians felt that they had to start from the beginning each time, which they found  
43 exhausting.  
44  
45  
46  
47  
48  
49  
50

51  
52  
53 *“I am an introverted person. I am not able to speak openly with everyone. When I meet a new*  
54 *physician, I have to start from the beginning, and I don’t like it. And it’s OK to feel like this.*  
55 *We’re all different” (patient 2, woman aged 73 years).*  
56  
57  
58  
59  
60

1  
2  
3 In addition to the discomfiting feeling of having to deal with new physicians, some  
4 participants reported that information was not forwarded between the different physicians,  
5 resulting in misunderstandings. They felt insecure and that no one was in charge of their  
6 medical care, for example, when experiencing changes in treatment at the same time as they  
7 changed physicians/junior doctors. Further, some participants highlighted that a lack of co-  
8 ordination in treatment and care imposed an extra burden, and emphasized that confidence  
9 was inspired by better organization and by the professional knowledge and ability of nurses  
10 and physicians to answer questions.  
11  
12  
13  
14  
15  
16  
17  
18  
19  
20  
21

## 22 **Discussion**

23  
24 To our knowledge, this is the first study to explore the thoughts of patients with colorectal  
25 cancer undergoing palliative care about how information was communicated about their  
26 disease, prognosis and life expectancy, from the first time that they were informed that their  
27 disease was incurable to post-surgery palliative treatment.  
28  
29  
30  
31  
32  
33

34 Evident in our findings was the asymmetrical relationship in which the physicians held  
35 the knowledge and expertise about the disease and the participants had to trust them. As  
36 Løgstrup<sup>19</sup> emphasizes, trust is something fundamental to our lives and implies that you  
37 expose yourself to others and become vulnerable. Vulnerability implies that others are in  
38 control and hold their fellow humans' lives in their hands. The responsibility of HCPs in such  
39 asymmetrical relationships is especially important in palliative care. The participants wanted  
40 information about their incurable cancer to be provided in a sensible and sensitive way, in a  
41 setting that allowed enough time. However, according to many of our participants, the  
42 communication in these meetings failed to give them sufficient help to deal with the  
43 information and their vulnerability. Being the first to inform patients that they have an  
44 incurable disease is difficult, and bearers of bad news may later be blamed despite their best  
45 intentions to provide information in a sensitive manner. Furthermore, in surgical departments,  
46  
47  
48  
49  
50  
51  
52  
53  
54  
55  
56  
57  
58  
59  
60

1  
2  
3 there is limited time allocated for surgeon–patient communication, and doctors in surgical  
4 specialities are significantly more likely to be rated poorly than non-surgical specialists or  
5  
6  
7  
8 GPs when breaking bad news.<sup>18</sup>  
9

10 Previous studies highlight that palliative treatment implies hope. Hope is an important  
11 coping strategy in such patients,<sup>28 29</sup> and has been described as essential for human life. The  
12 realistic hope for most of our participants was that something could be done to relieve their  
13 symptoms and potentially to postpone death, and to enable them to lead ordinary everyday  
14 lives and have the possibility of spending time with family and friends. Therefore, the patients  
15 emphasized the importance of HCPs including hope in their communications of disease,  
16 prognosis and life expectancy throughout the disease trajectory. Studies have shown that there  
17 is a fine balance between telling the truth and nurturing hope, and that there is a spectrum of  
18 hope, from hope for a cure to hope for living as normally as possible.<sup>16 30</sup> This aspect was  
19 also identified in our study.  
20  
21  
22  
23  
24  
25  
26  
27  
28  
29  
30  
31  
32

33 There was diversity in how detailed the participants wanted information about their  
34 disease and likely future prospects to be. Previous work indicates that patients with incurable  
35 cancer want truthful information about their disease, treatment and likely future prospects.<sup>31</sup>  
36  
37  
38  
39  
40  
41  
42  
43  
44  
45  
46  
47  
48  
49  
50  
51  
52  
53  
54  
55  
56  
57  
58  
59  
60  
60  
<sup>32</sup> However, because of individual preferences, individually customized approaches would  
seem desirable,<sup>33 34</sup> and could be considered an important part of a patient's life-world that  
should be attended to in communication between patients and physicians or nurses. Although  
all the participants in the present study were aware of the incurable nature of their disease, we  
did not explore the accuracy of their prognostic awareness. However, in a systematic review  
and meta-regression analysis, Chen et al.<sup>35</sup> identified that only half the cancer patients with  
advanced disease accurately understood their prognosis.

In our study, the participants emphasized the importance of organizing all their  
palliative treatment and care with well-qualified physician or nurse. They seemed to prefer



1  
2  
3 that physician or nurse communications included what Mishler<sup>20</sup> has characterized as the  
4  
5 “voice of medicine”, which mainly focuses on the symptoms and medical and technical  
6  
7 problems or aspects of the disease. But they also wanted physicians and nurses to initiate  
8  
9 communication focusing on the participants’ inner thoughts related to their illness, Mishler’s  
10  
11  
12  
13  
14  
15  
16  
17  
18  
19  
20  
21  
22  
23  
24  
25  
26  
27  
28  
29  
30  
31  
32  
33  
34  
35  
36  
37  
38  
39  
40  
41  
42  
43  
44  
45  
46  
47  
48  
49  
50  
51  
52  
53  
54  
55  
56  
57  
58  
59  
60  
20 “voice of the lifeworld”, which included asking more open-ended questions. Physicians and  
nurses who do this are characterized as compassionate caregivers.<sup>36</sup>

### **Implications for health care**

It might be considered overly demanding to be the bearer of the bad news that a patient has an incurable disease. Some of our participants experienced the first information about their incurable disease as delayed, insufficient, given in an inappropriate way or at an inappropriate place. This indicates that there is a need for increased focus on communication by HCPs both during their university studies and in hospitals.<sup>8</sup> Furthermore, it would be desirable for surgeons to have more time allocated to conveying information and communicating with patients.

Physicians and nurses have extensive responsibilities in how they communicate with patients who have an incurable disease, particularly because of the asymmetrical relationship between patients and HCPs. The HCPs have knowledge about how the disease will most likely progress and about common psychological responses. However, the patients’ inner thoughts and life-world are not necessarily known to the HCPs. The responsibility to invite or initiate communication about the patients’ inner thoughts is in the hands of the physicians and nurses. Furthermore, it is important to strive for a more symmetrical relationship between patients and HCPs,<sup>19 28</sup> which will also increase the possibility of shared decision-making in treatment and care.

The participants preferred compassionate physicians and nurses. Being compassionate requires more than empathy; it requires knowledge, proactivity and interconnectedness.<sup>36</sup>

1  
2  
3 Furthermore, to become a compassionate physician or nurse, training is required involving  
4 observation, guidance and feedback about one's own practice.<sup>36</sup> HCPs also need to be aware  
5 of how much information each patient prefers and discuss this with the patient. Previous  
6 studies have shown that this awareness is associated with years of practice and confidence.<sup>8 10</sup>  
7  
8 Treatment and care of patients undergoing palliative chemotherapy should be organized in  
9 such a way that patients are able to see the same well-qualified physician and optionally also  
10 the same nurses at each consultation. Furthermore, palliative health care should include  
11 guidelines on how to treat the patients more smoothly, and allow enough time for  
12 communication with this vulnerable patient group.  
13  
14  
15  
16  
17  
18  
19  
20  
21  
22  
23  
24

### 25 **Methodological considerations**

26  
27 The strengths of the study are that the 20 participants provided us with rich data about their  
28 experiences, feelings and reflections upon the information and communication by HCPs about  
29 their disease and life expectancy during their disease trajectory. Qualitative content analysis  
30 aims to stay close to the data and texts to elucidate the findings, although our pre-  
31 understanding of the issues as researchers might also have influenced the analysis of the data.  
32  
33 Another strength of our study is that it included patients with one type of cancer who were in  
34 the palliative phase. Colorectal cancer is the second most common cancer diagnosed in  
35 women worldwide, and the third most common cancer diagnosed in men;<sup>21 22</sup> thus, the  
36 knowledge gained in this study could be applied to this large group of patients. However, it is  
37 also possible that studying just one patient group might limit the variation in findings that  
38 may have been identified by including more heterogeneous groups. We have limited  
39 systematic information about the participants' socio-demographic variables, common  
40 behaviour and coping mechanisms that might have influenced their experiences and  
41 preferences. However, based on the few characteristics we identified during the interviews,  
42 the variations in socio-demographic factors such as gender, age, and marital status seem to be  
43  
44  
45  
46  
47  
48  
49  
50  
51  
52  
53  
54  
55  
56  
57  
58  
59  
60

1  
2  
3 similar to those of patients with colorectal cancer reported by Jemal et al.<sup>21</sup> Although our  
4  
5 findings are not generalizable to patients with other cancer diagnoses, they may be  
6  
7 transferable to hospitals with a similar organization of surgery and post-surgery palliative  
8  
9 treatments.  
10

## 11 12 13 **Conclusions**

14  
15  
16 The findings of this study provide a deeper understanding about how patients with incurable  
17  
18 colorectal cancer undergoing palliative treatment experience and reflect upon HCP–patient  
19  
20 communication about disease and life expectancy from before surgery through to post-surgery  
21  
22 chemotherapy. The process of receiving the first information that they had an incurable  
23  
24 disease was generally experienced as inadequate, while post-surgery palliative chemotherapy,  
25  
26 physicians and nurses offered hope. The participants preferred customized information about  
27  
28 treatment and likely future prospects, and physicians and nurses who used a holistic approach  
29  
30 focusing on their life-world with compassion. To become a sensitive, holistic and  
31  
32 compassionate physician or nurse requires knowledge and confidence, and to achieve this,  
33  
34 training and guidance are needed.  
35  
36  
37  
38  
39  
40  
41  
42  
43  
44  
45  
46  
47  
48  
49  
50  
51  
52  
53  
54  
55  
56  
57  
58  
59  
60

### Authors' contributions

GR and IV were responsible for the study design. GR was responsible for the patient interviews and data collection. GR, US and IV contributed to a critical appraisal of the analysis, manuscript preparation, and read and approved the final version of the manuscript.

**Competing interests:** The authors declare that they have no competing interests.

**Acknowledgements:** We thank the Department of Clinical Research at Sorlandet Hospital and the Faculty of Health and Sport Science, University of Agder for funding the study. Gudrun Rohde was a visiting researcher, as an Affiliate Academic, in the Marie Curie Palliative Care Research Department, University College London, January–June 2017 while writing most of the paper. We wish to thank the three patients who helped us with pilot interviews during the design of the study, as well as all the patients who participated.

**Funding:** No further funding to disclose.

**Data sharing statement:** Owing to the sensitive nature of the information (in Norwegian) and appropriate medical ethics, access to the raw data is difficult.

### References

1. McRee AJ, Goldberg RM. Optimal management of metastatic colorectal cancer: current status. *Drugs* 2011;71(7):869-84.
2. Cameron J, Waterworth S. Patients' experiences of ongoing palliative chemotherapy for metastatic colorectal cancer: a qualitative study. *International journal of palliative nursing* 2014;20(5):218-24. [published Online First: 2014/05/24]
3. Cameron MG, Kersten C, Guren MG, et al. Palliative pelvic radiotherapy of symptomatic incurable prostate cancer - a systematic review. *Radiother Oncol* 2014;110(1):55-60. doi: 10.1016/j.radonc.2013.08.008 [published Online First: 2013/09/21]
4. Cameron MG, Kersten C, Vistad I, et al. Palliative pelvic radiotherapy for symptomatic rectal cancer - a prospective multicenter study. *Acta Oncol* 2016;55(12):1400-07. doi: 10.1080/0284186x.2016.1191666 [published Online First: 2016/06/23]
5. Hancock K, Clayton JM, Parker SM, et al. Truth-telling in discussing prognosis in advanced life-limiting illnesses: a systematic review. *Palliat Med* 2007;21(6):507-17. doi: 10.1177/0269216307080823 [published Online First: 2007/09/12]

- 1
  - 2
  - 3
  - 4
  - 5
  - 6
  - 7
  - 8
  - 9
  - 10
  - 11
  - 12
  - 13
  - 14
  - 15
  - 16
  - 17
  - 18
  - 19
  - 20
  - 21
  - 22
  - 23
  - 24
  - 25
  - 26
  - 27
  - 28
  - 29
  - 30
  - 31
  - 32
  - 33
  - 34
  - 35
  - 36
  - 37
  - 38
  - 39
  - 40
  - 41
  - 42
  - 43
  - 44
  - 45
  - 46
  - 47
  - 48
  - 49
  - 50
  - 51
  - 52
  - 53
  - 54
  - 55
  - 56
  - 57
  - 58
  - 59
  - 60
6. Hagerty RG, Butow PN, Ellis PM, et al. Communicating prognosis in cancer care: a systematic review of the literature. *Ann Oncol* 2005;16(7):1005-53. doi: 10.1093/annonc/mdi211 [published Online First: 2005/06/09]
7. Chou WS, Hamel LM, Thai CL, et al. Discussing prognosis and treatment goals with patients with advanced cancer: A qualitative analysis of oncologists' language. *Health expectations : an international journal of public participation in health care and health policy* 2017;20(5):1073-80. doi: 10.1111/hex.12549 [published Online First: 2017/03/07]
8. Suwanabol PA, Kanters AE, Reichstein AC, et al. Characterizing the Role of U.S. Surgeons in the Provision of Palliative Care: A Systematic Review and Mixed-Methods Meta-Synthesis. *J Pain Symptom Manage* 2018;55(4):1196-215.e5. doi: 10.1016/j.jpainsymman.2017.11.031 [published Online First: 2017/12/10]
9. Dillon BR, Healy MA, Lee CW, et al. Surgeon Perspectives Regarding Death and Dying. *Journal of palliative medicine* 2018 doi: 10.1089/jpm.2018.0197 [published Online First: 2018/11/21]
10. Rogg L, Aasland OG, Graugaard PK, et al. Direct communication, the unquestionable ideal? Oncologists' accounts of communication of bleak prognoses. *Psychooncology* 2010;19(11):1221-28.
11. Murray CD, McDonald C, Atkin H. The communication experiences of patients with palliative care needs: A systematic review and meta-synthesis of qualitative findings. *Palliative & supportive care* 2015;13(2):369-83. doi: 10.1017/s1478951514000455 [published Online First: 2014/05/03]
12. Martinsson L, Axelsson B, Melin-Johansson C. Patients' perception of information from physicians during palliative chemotherapy: a qualitative study. *Psychooncology* 2016;14(5):495-502. doi: 10.1017/S1478951515001200
13. Kirk P, Kirk I, Kristjanson LJ. What do patients receiving palliative care for cancer and their families want to be told? A Canadian and Australian qualitative study. *BMJ* 2004;328(7452):1343. doi: 10.1136/bmj.38103.423576.55 [published Online First: 2004/05/21]
14. Butow PN, Dowsett S, Hagerty R, et al. Communicating prognosis to patients with metastatic disease: what do they really want to know? *Support Care Cancer* 2002;10(2):161-8. doi: 10.1007/s005200100290 [published Online First: 2002/02/28]
15. Clarke MG, Kennedy KP, MacDonagh RP. Discussing life expectancy with surgical patients: do patients want to know and how should this information be delivered? *BMC medical informatics and decision making* 2008;8:24. doi: 10.1186/1472-6947-8-24 [published Online First: 2008/06/17]
16. Clayton JM, Butow PN, Arnold RM, et al. Fostering coping and nurturing hope when discussing the future with terminally ill cancer patients and their caregivers. *Cancer* 2005;103(9):1965-75. doi: 10.1002/cncr.21011 [published Online First: 2005/03/25]
17. Stajduhar KI, Thorne SE, McGuinness L, et al. Patient perceptions of helpful communication in the context of advanced cancer. *J Clin Nurs* 2010;19(13-14):2039-47. doi: 10.1111/j.1365-2702.2009.03158.x [published Online First: 2010/10/06]
18. Barnett MM. Effect of breaking bad news on patients' perceptions of doctors. *Journal of the Royal Society of Medicine* 2002;95(7):343-7. [published Online First: 2002/07/02]
19. Løgstrup KE. The ethical demand. Notre Dame, Ill: University of Notre Dame Press 1997.
20. G ME. The Discourse of Medicine - Dialectics of Medical Interviews. New Jersey: Ablex Publishing Corporation, Norwood, New Jersey 1984.
21. Jemal A, Center MM, DeSantis C, et al. Global patterns of cancer incidence and mortality rates and trends. *Cancer Epidemiol Biomarkers Prev* 2010;19(8):1893-907. doi: 10.1158/1055-9965.epi-10-0437 [published Online First: 2010/07/22]

22. Torre LA, Bray F, Siegel RL, et al. Global cancer statistics, 2012. *CA Cancer J Clin* 2015;65(2):87-108. doi: 10.3322/caac.21262 [published Online First: 2015/02/06]
23. Crabtree BF, Miller WL. Doing qualitative research. Thousand Oaks, Calif.: Sage 1999.
24. Rohde G, Kersten C, Vistad I, et al. Spiritual Well-being in Patients With Metastatic Colorectal Cancer Receiving Noncurative Chemotherapy: A Qualitative Study. *Cancer Nurs* 2016 doi: 10.1097/ncc.0000000000000385 [published Online First: 2016/04/22]
25. Polit DF. Essentials of nursing research: methods, appraisal, and utilization. Philadelphia: Lippincott Williams & Wilkins 2006.
26. Beauchamp TL, Childress JF. Principles of biomedical ethics. 7th ed. ed. New York: Oxford University Press 2013.
27. WMA Declaration of Helsinki. Ethical Principles for Medical Research Involving Human Subjects 2013 [Available from: <http://www.wma.net/en/30publications/10policies/b3/>].
28. Hegarty M. The Dynamic of Hope: Hoping in the Face of Death. *Progress in Palliative Care* 2001;9(2):42-46. doi: 10.1080/09699260.2001.11746903
29. Rustoen T. Hope and quality of life, two central issues for cancer patients: a theoretical analysis. *Cancer Nurs* 1995;18(5):355-61. [published Online First: 1995/10/01]
30. Clayton JM, Butow PN, Arnold RM, et al. Discussing life expectancy with terminally ill cancer patients and their carers: a qualitative study. *Support Care Cancer* 2005;13(9):733-42. doi: 10.1007/s00520-005-0789-4 [published Online First: 2005/03/12]
31. Miccinesi G, Bianchi E, Brunelli C, et al. End-of-life preferences in advanced cancer patients willing to discuss issues surrounding their terminal condition. *Eur J Cancer Care (Engl)* 2012;21(5):623-33. doi: 10.1111/j.1365-2354.2012.01347.x [published Online First: 2012/04/24]
32. Hagerty RG, Butow PN, Ellis PA, et al. Cancer patient preferences for communication of prognosis in the metastatic setting. *J Clin Oncol* 2004;22(9):1721-30. doi: 10.1200/jco.2004.04.095 [published Online First: 2004/05/01]
33. Mackenzie LJ, Carey ML, Paul CL, et al. Do we get it right? Radiation oncology outpatients' perceptions of the patient centredness of life expectancy disclosure. *Psychooncology* 2013;22(12):2720-8. doi: 10.1002/pon.3337 [published Online First: 2013/06/27]
34. Walczak A, Butow PN, Davidson PM, et al. Patient perspectives regarding communication about prognosis and end-of-life issues: how can it be optimised? *Patient Educ Couns* 2013;90(3):307-14. doi: 10.1016/j.pec.2011.08.009 [published Online First: 2011/09/17]
35. Chen CH, Kuo SC, Tang ST. Current status of accurate prognostic awareness in advanced/terminally ill cancer patients: Systematic review and meta-regression analysis. *Palliat Med* 2017;31(5):406-18. doi: 10.1177/0269216316663976 [published Online First: 2016/08/06]
36. Larkin PJ. Compassion - The Essence of Palliative and End-of-life Care. First ed. New York: Oxford University Press 2016.

**Table 1:** Characteristics of patients receiving non-curative chemotherapy.

|                                                     | First-line ( <i>n</i> = 12) | Second-line ( <i>n</i> = 8) |
|-----------------------------------------------------|-----------------------------|-----------------------------|
| Women                                               | 5                           | 3                           |
| Men                                                 | 7                           | 5                           |
| Mean age (range), years                             | 63 (34–75)                  | 69 (64–75)                  |
| Marital status:                                     |                             |                             |
| Married/cohabiting                                  | 10                          | 8                           |
| Single                                              | 1                           |                             |
| Widow/widower                                       | 1                           |                             |
| Chemotherapy used:                                  |                             |                             |
| FOLFIRI/bevacizumab                                 | 10                          |                             |
| FLOX (5-fluorouracil, folinic acid,<br>oxaliplatin) | 1                           | 8                           |
| Capecitabine plus oxaliplatin (XELOX)               | 1                           |                             |

All patients received 5-fluorouracil-based combination chemotherapy with irinotecan or oxaliplatin, +/- bevacizumab.

**Table 1**

Consolidated criteria for reporting qualitative studies (COREQ): 32-item checklist

| No                                             | Item                                     | Guide questions/description                                                           |
|------------------------------------------------|------------------------------------------|---------------------------------------------------------------------------------------|
| <b>Domain 1: Research team and reflexivity</b> |                                          |                                                                                       |
| Personal Characteristics                       |                                          |                                                                                       |
| 1.                                             | Interviewer/facilitator                  | G Rohde (All interviews), p 7                                                         |
| 2.                                             | Credentials                              | PhD and professors, p 1                                                               |
| 3.                                             | Occupation                               | Professors, p 1                                                                       |
| 4.                                             | Gender                                   | All female, p 7                                                                       |
| 5.                                             | Experience and training                  | All were trained researchers, p 7                                                     |
| Relationship with participants                 |                                          |                                                                                       |
| 6.                                             | Relationship established                 | No relationship before the interviews, p 7                                            |
| 7.                                             | Participant knowledge of the interviewer | The participants did not know the interviewer, p 7                                    |
| 8.                                             | Interviewer characteristics              | Nurse and professor and had interests for the topic, p 7                              |
| <b>Domain 2: study design</b>                  |                                          |                                                                                       |
| Theoretical framework                          |                                          |                                                                                       |
| 9.                                             | Methodological orientation and Theory    | Content analysis, p7                                                                  |
| Participant selection                          |                                          |                                                                                       |
| 10.                                            | Sampling                                 | The patients physicians asked if the researcher could contact them for inclusion, p 6 |
| 11.                                            | Method of approach                       | Face-to-face, p 7                                                                     |
| 12.                                            | Sample size                              | Twenty patients (Twelve men and eight women), p 6                                     |



| No                                      | Item                           | Guide questions/description                                                                  |
|-----------------------------------------|--------------------------------|----------------------------------------------------------------------------------------------|
| 13.                                     | Non-participation              | We have limited information about this, p 6                                                  |
| Setting                                 |                                |                                                                                              |
| 14.                                     | Setting of data collection     | Out-patient clinic and patients home (one patient), p 7                                      |
| 15.                                     | Presence of non-participants   | Non, p 6                                                                                     |
| 16.                                     | Description of sample          | Patients with metastatic colorectal cancer receiving non-curative chemotherapy, p 6          |
| Data collection                         |                                |                                                                                              |
| 17.                                     | Interview guide                | The interview guide was made by the researchers, p 7 and 8                                   |
| 18.                                     | Repeat interviews              | No repeated interviews were performed, p 7                                                   |
| 19.                                     | Audio/visual recording         | Audio recording was used to collect the data, p 7                                            |
| 20.                                     | Field notes                    | Field notes were made after the interviews, not stated in the manuscript                     |
| 21.                                     | Duration                       | 50-100 minutes, p 7                                                                          |
| 22.                                     | Data saturation                | Data saturation was discussed and reached, p 7                                               |
| 23.                                     | Transcripts returned           | The transcripts were not returned to participants for comments, not stated in the manuscript |
| <b>Domain 3: analysis and findingsz</b> |                                |                                                                                              |
| Data analysis                           |                                |                                                                                              |
| 24.                                     | Number of data coders          | one, p 8                                                                                     |
| 25.                                     | Description of the coding tree | The authors provided a description of the coding, p 8                                        |
| 26.                                     | Derivation of themes           | The themes were derived from the data, p 8                                                   |

| No        | Item                         | Guide questions/description                                                              |
|-----------|------------------------------|------------------------------------------------------------------------------------------|
| 27.       | Software                     | none                                                                                     |
| 28.       | Participant checking         | The participants did not provide feedback on the findings, not written in the manuscript |
| Reporting |                              |                                                                                          |
| 29.       | Quotations presented         | The quotations presented illustrate the themes / findings, p 9 - 14                      |
| 30.       | Data and findings consistent | There was consistency between the data presented and the findings p 8 - 14               |
| 31.       | Clarity of major themes      | Major themes were clearly presented in the findings, p 8                                 |
| 32.       | Clarity of minor themes      | No                                                                                       |
